# Supplementary material for: Recurrent functional misinterpretation of RNA-seq data caused by sample-specific gene length bias
Source: PubMed Central journal article supplement (PMC6850523; doi:10.1371/journal.pbio.3000481), 2019-11-12

**GSE64233 (Dataset1): RPKM**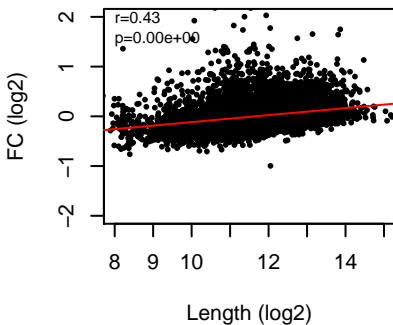**GSE115946 (Dataset2): RPKM**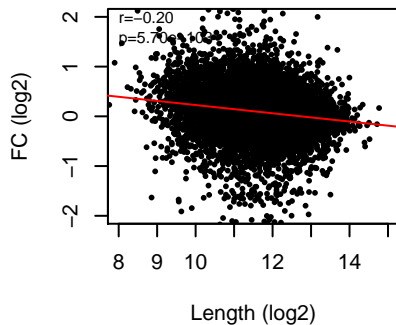**GSE100061 (Dataset3): RPKM**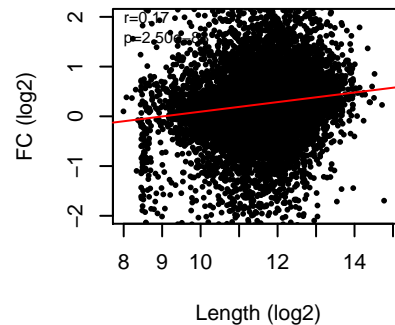**GSE102849 (Dataset4): RPKM**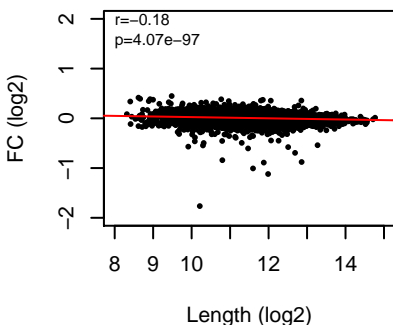**GSE109064 (Dataset5): RPKM**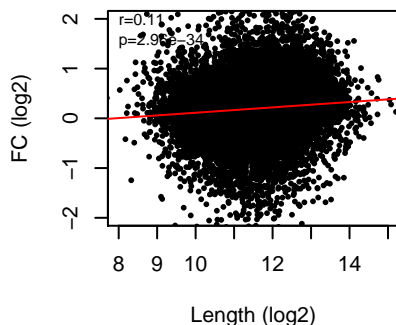**GSE109892 (Dataset6): RPKM**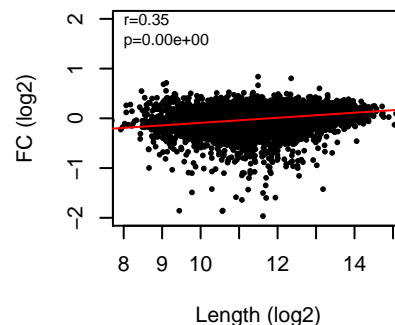**GSE97831 (Dataset7): RPKM**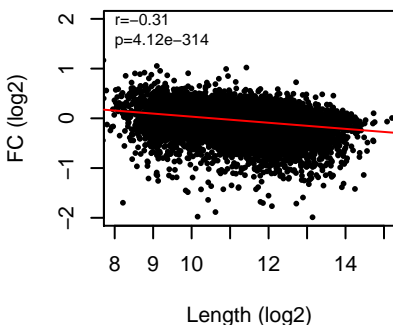**GSE101738 (Dataset8): RPKM**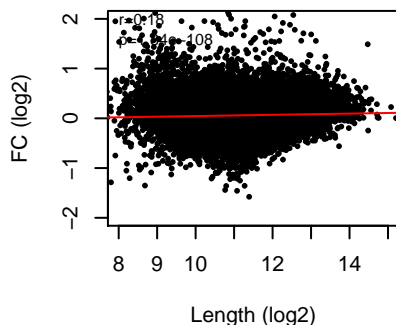**GSE110492 (Dataset9): RPKM**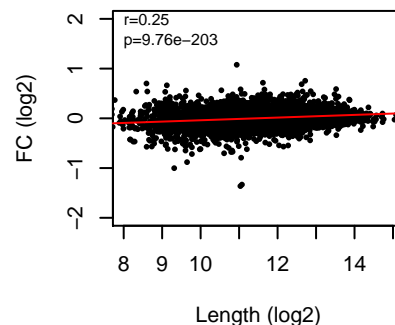

**GSE99647 (Dataset10): RPKM**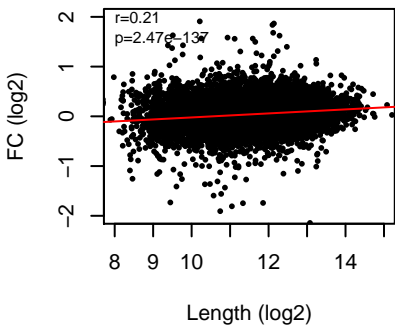**GSE110386 (Dataset11): RPKM**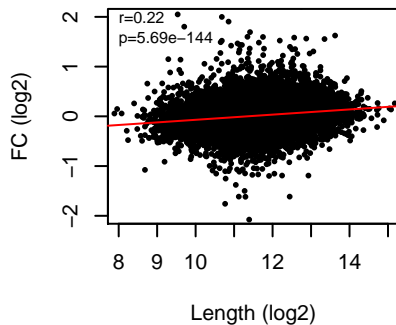**GSE108693 (Dataset12): RPKM**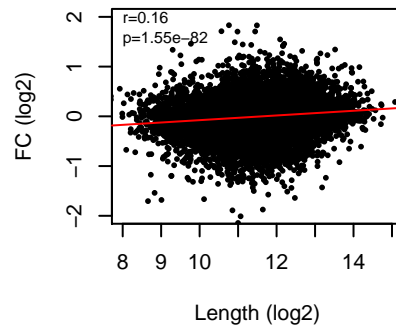**GSE74383 (Dataset13): RPKM**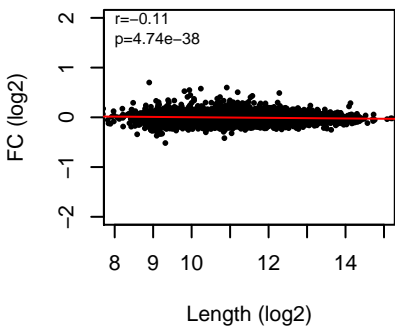**GSE100751 (Dataset14): RPKM**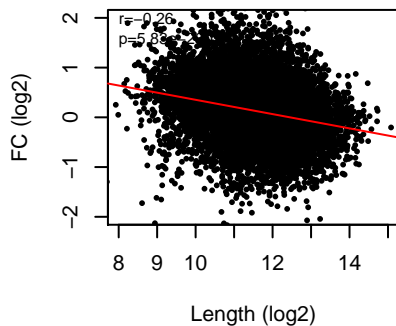**GSE95097 (Dataset15): RPKM**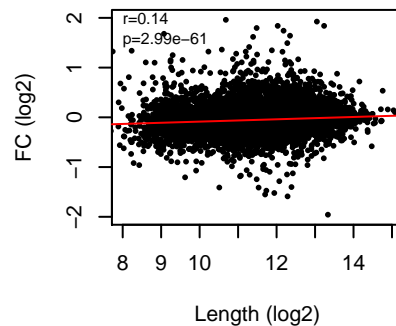**GSE77295 (Dataset16): RPKM**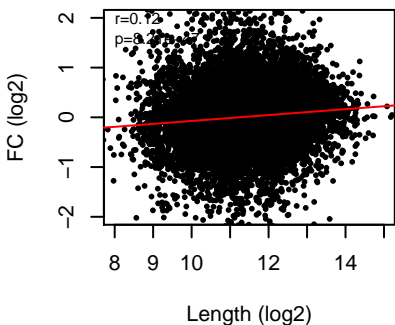**GSE100676 (Dataset17): RPKM**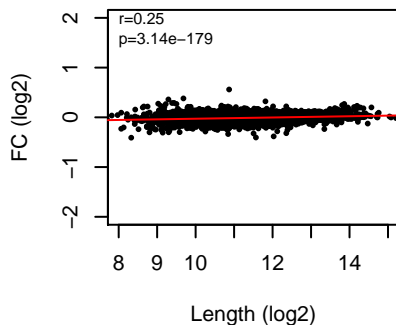**GSE101788 (Dataset18): RPKM**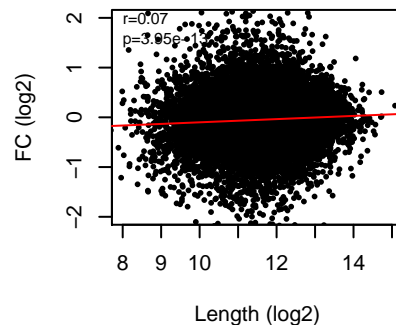

**GSE42509 (Dataset19): RPKM**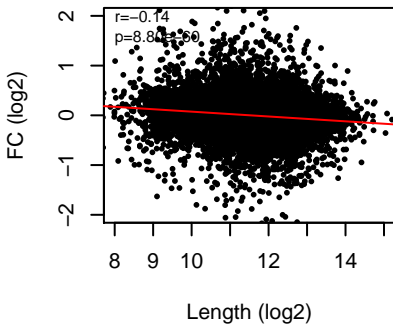**GSE76771 (Dataset20): RPKM**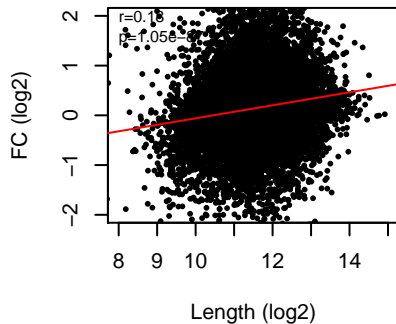**GSE84989 (Dataset21): RPKM**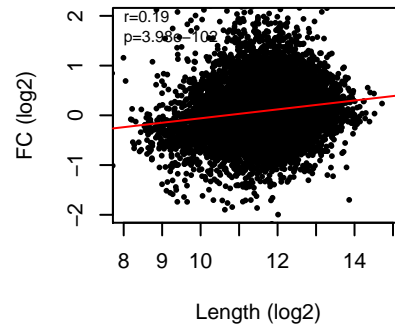**GSE106847 (Dataset22): RPKM**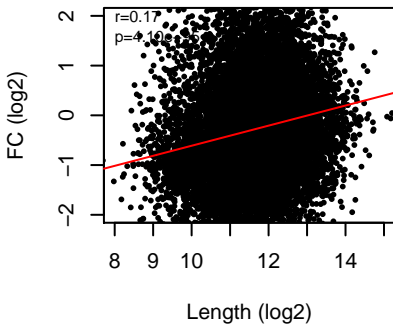**GSE114572 (Dataset23): RPKM**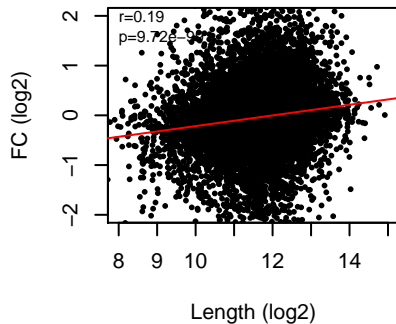**GSE99768 (Dataset24): RPKM**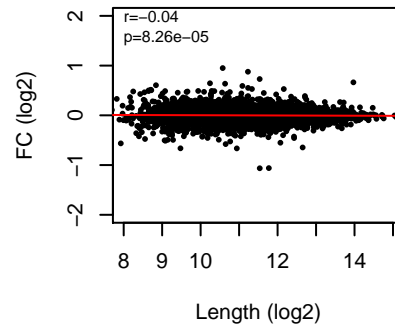**GSE111900 (Dataset25): RPKM**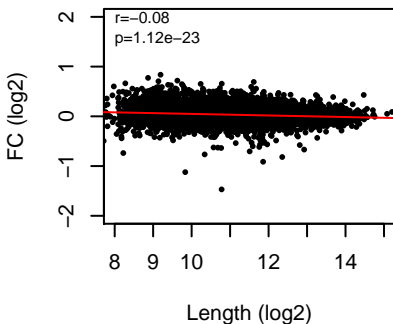**GSE83577 (Dataset26): RPKM**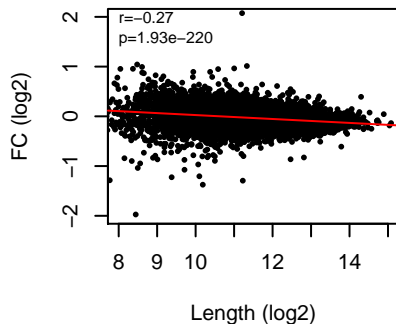**GSE103299 (Dataset27): RPKM**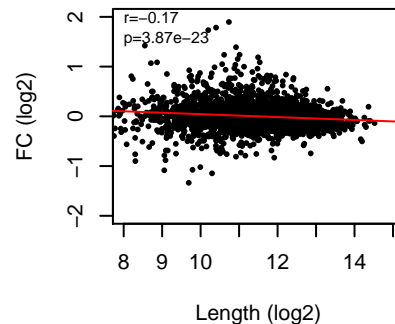

**GSE107071 (Dataset28): RPKM**

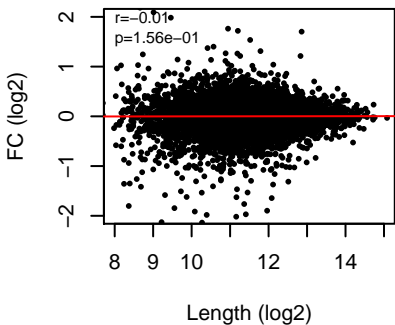

**GSE107230 (Dataset29): RPKM**

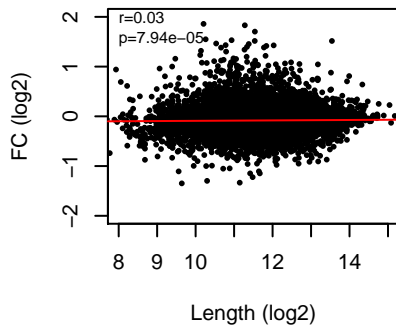

**GSE108569 (Dataset30): RPKM**

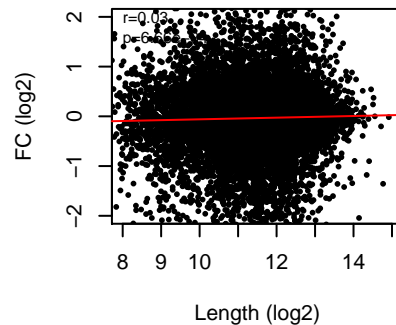

**GSE109709 (Dataset31): RPKM**

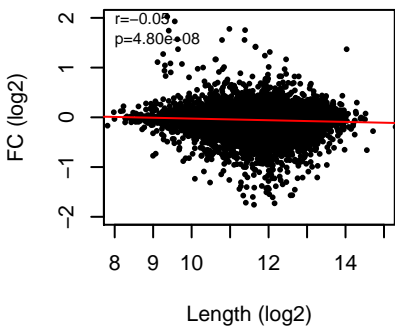

**GSE113837 (Dataset32): RPKM**

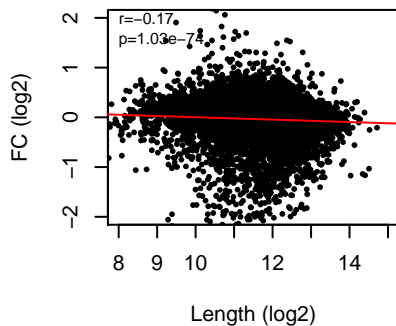

**GSE121095 (Dataset33): RPKM**

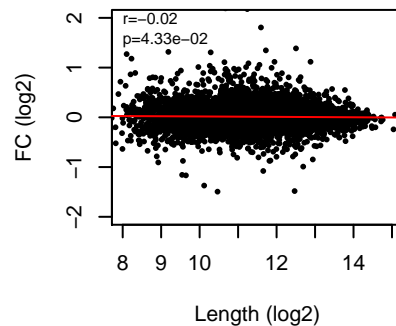

**GSE123689 (Dataset34): RPKM**

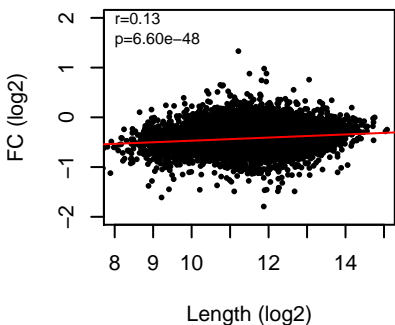

**GSE115899 (Dataset35): RPKM**

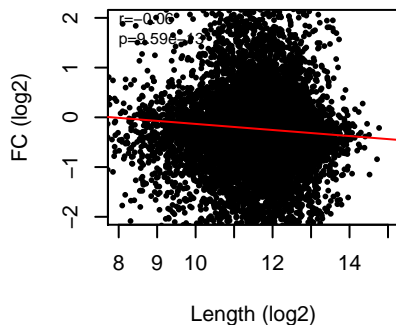

Supplement: pbio.3000481.s001.pdf [file pbio.3000481.s001.pdf]
