# Supplementary material for: Recurrent functional misinterpretation of RNA-seq data caused by sample-specific gene length bias
Source: PubMed Central journal article supplement (PMC6850523; doi:10.1371/journal.pbio.3000481), 2019-11-12

GSE64233 (Dataset1) treatment\_rep3vs1  
RPKM

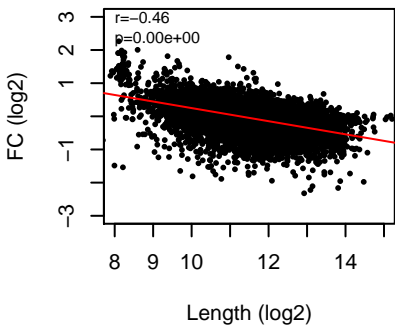

GSE115946 (Dataset2) control\_rep4vs1  
RPKM

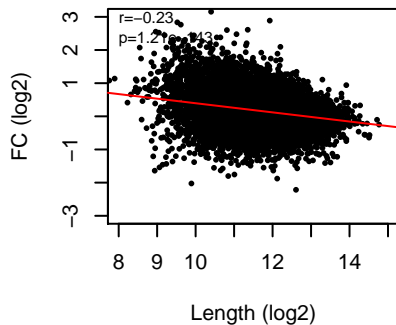

GSE100061 (Dataset3) treatment\_rep2vs1  
RPKM

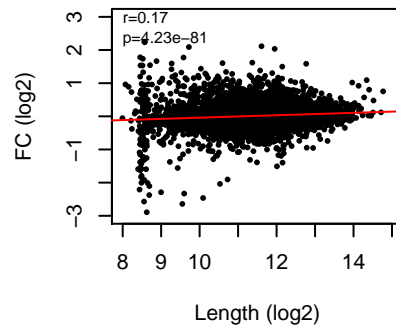

GSE102849 (Dataset4) treatment\_rep2vs1  
RPKM

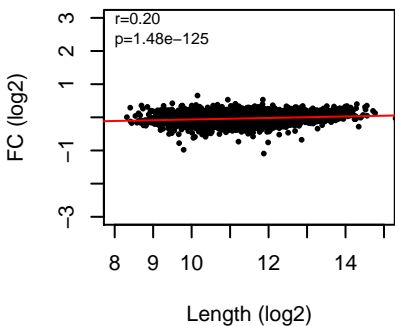

GSE109064 (Dataset5) control\_rep2vs1  
RPKM

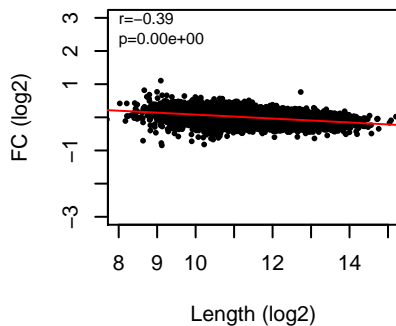

GSE109892 (Dataset6) treatment\_rep2vs1  
RPKM

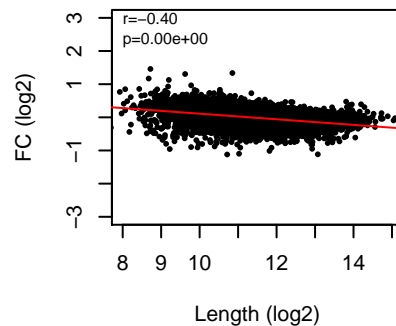

GSE97831 (Dataset7) treatment\_rep2vs1  
RPKM

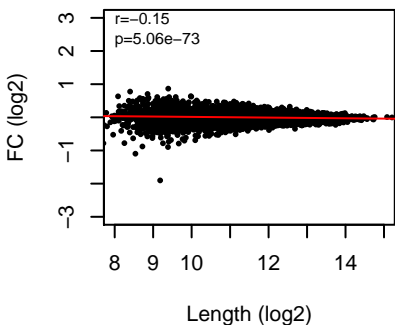

GSE101738 (Dataset8) treatment\_rep3vs1  
RPKM

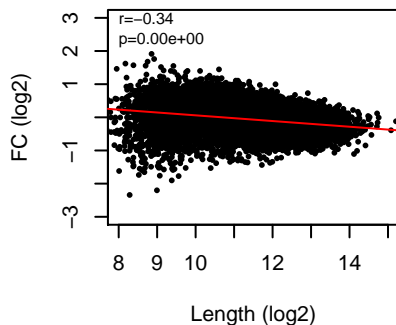

GSE110492 (Dataset9) control\_rep2vs1  
RPKM

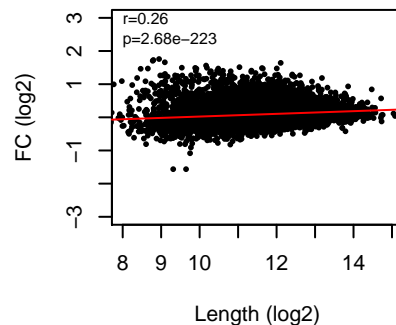

GSE99647 (Dataset10) treatment\_rep3vs2  
RPKM

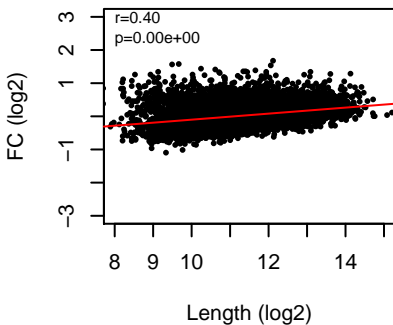

GSE110386 (Dataset11) treatment\_rep2vs1  
RPKM

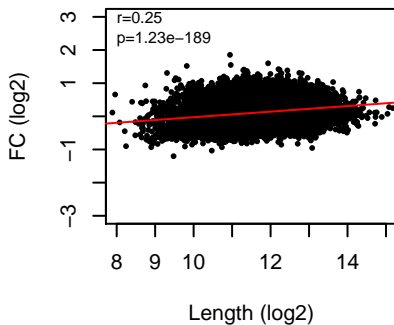

GSE108693 (Dataset12) treatment\_rep3vs1  
RPKM

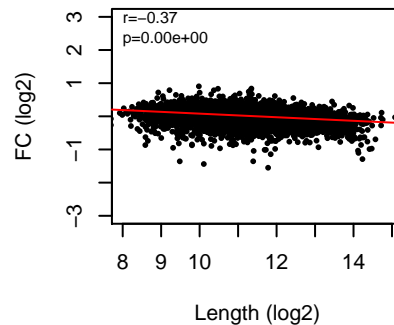

GSE74383 (Dataset13) treatment\_rep3vs1  
RPKM

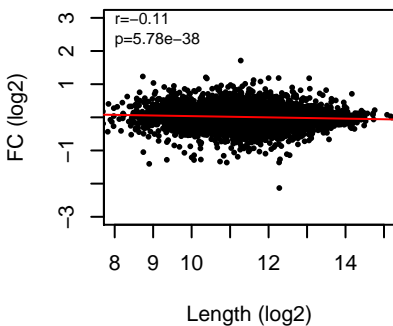

GSE100751 (Dataset14) treatment\_rep3vs1  
RPKM

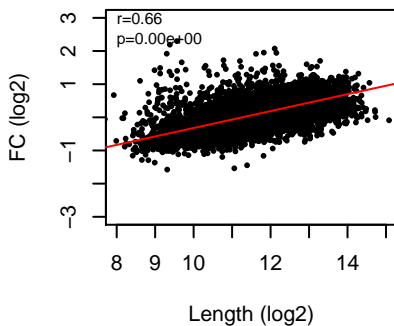

GSE95097 (Dataset15) treatment\_rep2vs1  
RPKM

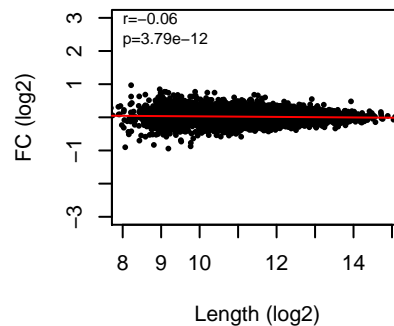

GSE77295 (Dataset16) control\_rep2vs1  
RPKM

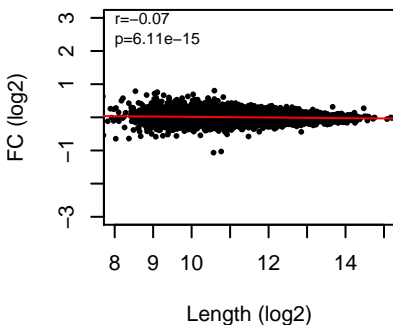

GSE100676 (Dataset17) treatment\_rep4vs2  
RPKM

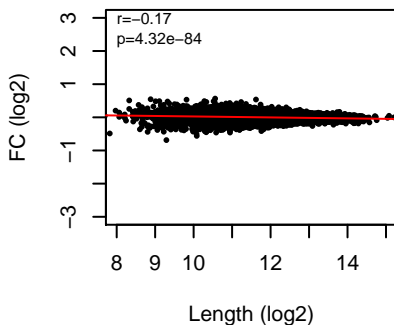

GSE101788 (Dataset18) control\_rep3vs1  
RPKM

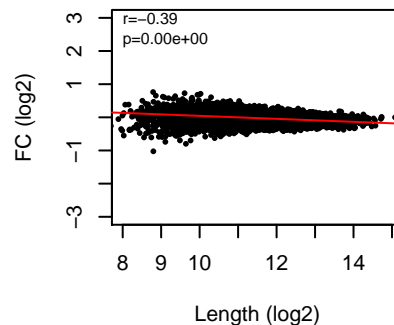

GSE42509 (Dataset19) control\_rep2vs1  
RPKM

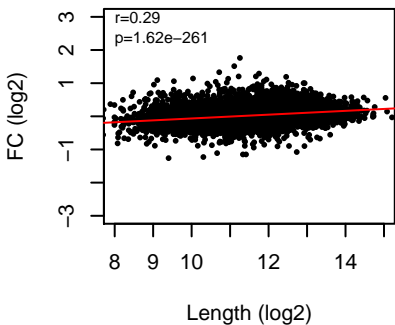

GSE76771 (Dataset20) control\_rep3vs1  
RPKM

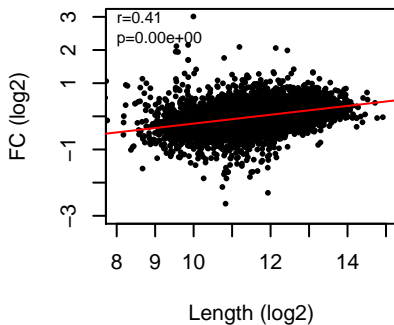

GSE84989 (Dataset21) control\_rep3vs1  
RPKM

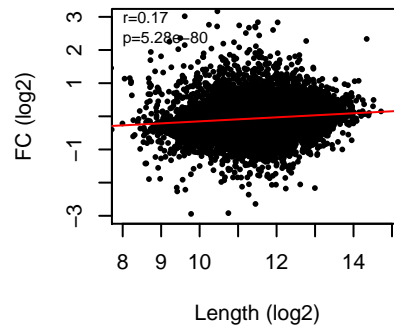

GSE106847 (Dataset22) control\_rep3vs1  
RPKM

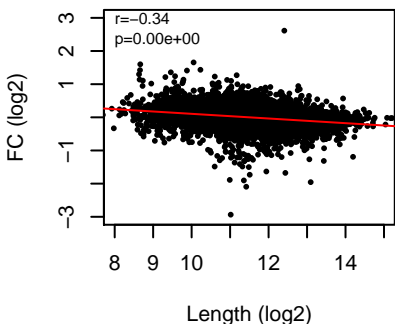

GSE114572 (Dataset23) treatment\_rep2vs1  
RPKM

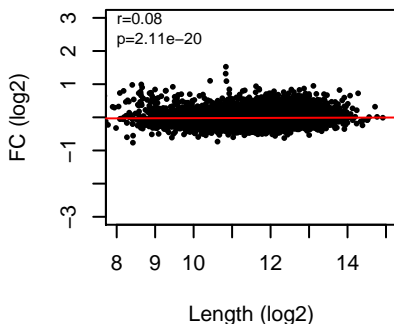

GSE99768 (Dataset24) control\_rep2vs1  
RPKM

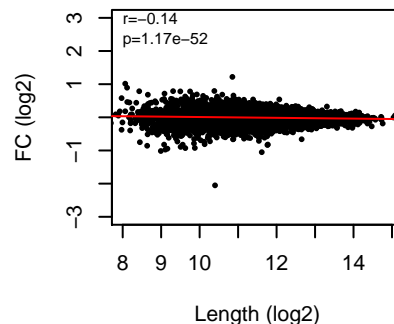

GSE111900 (Dataset25) control\_rep2vs1  
RPKM

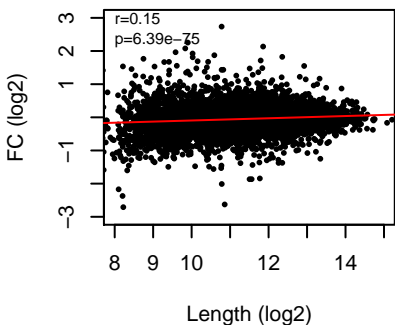

GSE83577 (Dataset26) control\_rep3vs1  
RPKM

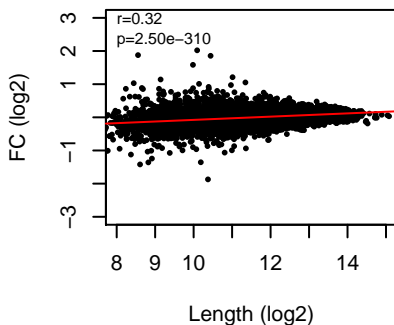

GSE103299 (Dataset27) treatment\_rep3vs1  
RPKM

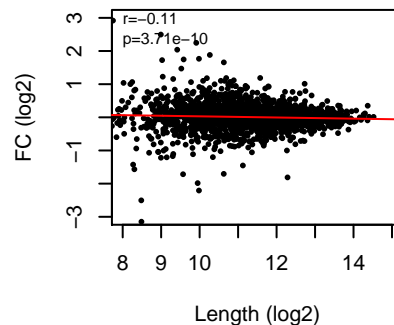

GSE107071 (Dataset28) control\_rep3vs1  
RPKM

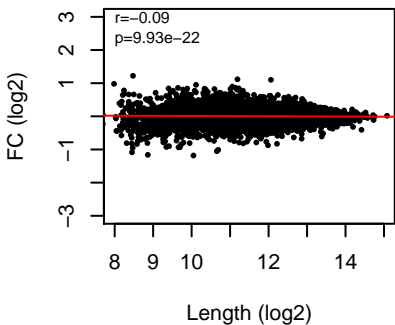

GSE107230 (Dataset29) control\_rep3vs2  
RPKM

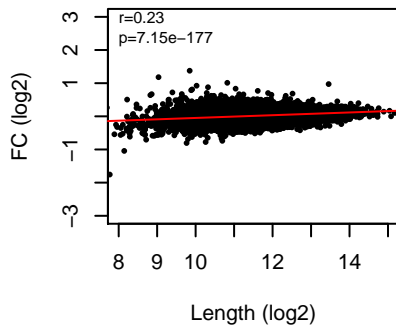

GSE108569 (Dataset30) treatment\_rep3vs1  
RPKM

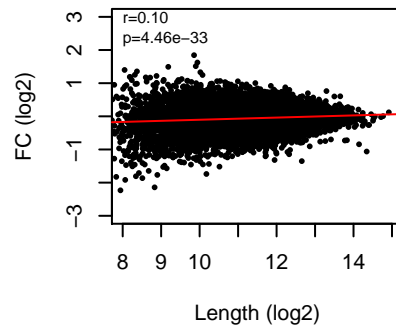

GSE109709 (Dataset31) treatment\_rep2vs1  
RPKM

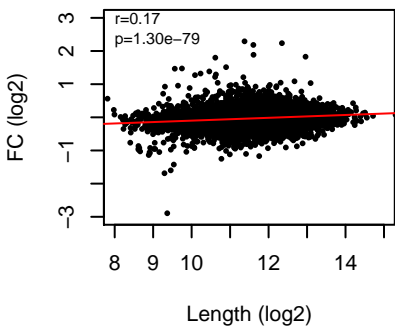

GSE113837 (Dataset32) treatment\_rep2vs1  
RPKM

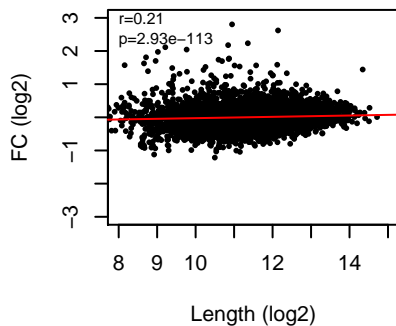

GSE121095 (Dataset33) treatment\_rep3vs1  
RPKM

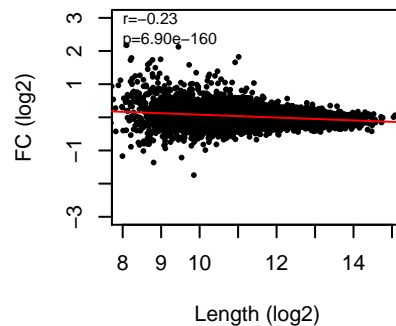

GSE123689 (Dataset34) treatment\_rep3vs1  
RPKM

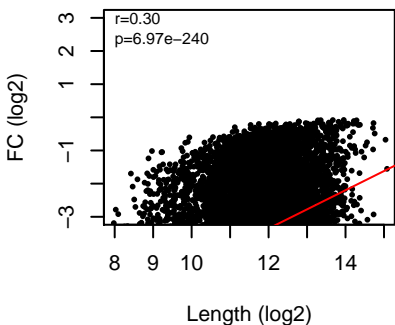

GSE115899 (Dataset35) treatment\_rep3vs2  
RPKM

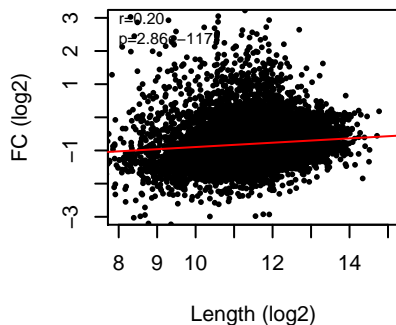

Supplement: pbio.3000481.s002.pdf [file pbio.3000481.s002.pdf]
