# Supplementary material for: Recurrent functional misinterpretation of RNA-seq data caused by sample-specific gene length bias
Source: PubMed Central journal article supplement (PMC6850523; doi:10.1371/journal.pbio.3000481), 2019-11-12

a Dataset #1: TNF (GSE64233): Replicate comparison

Original data

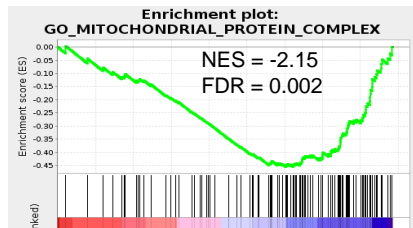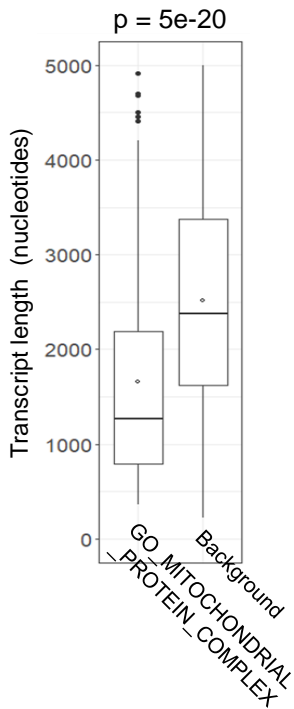

cqn normalization

Before

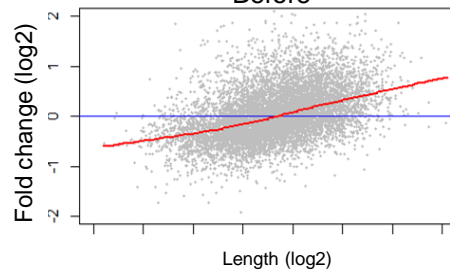

After

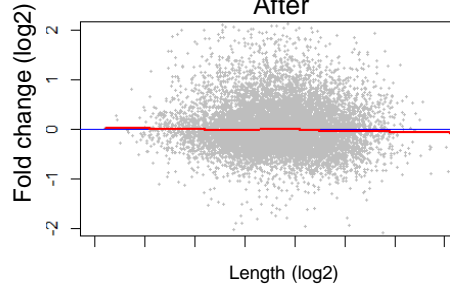

Corrected data

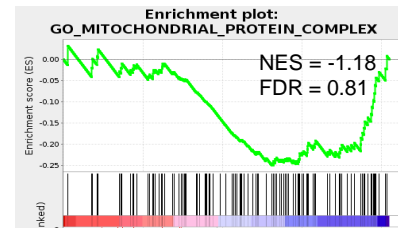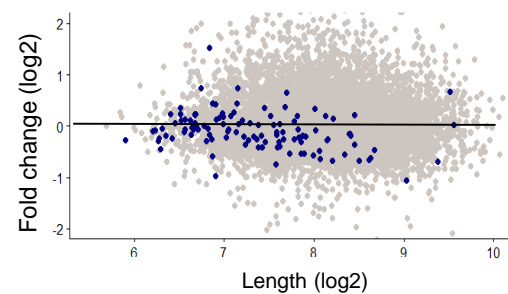

b Dataset #1: TNF (GSE64233): Replicate comparison

Original data

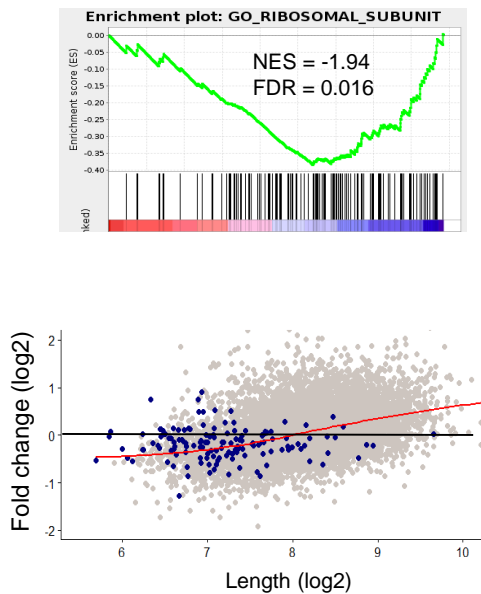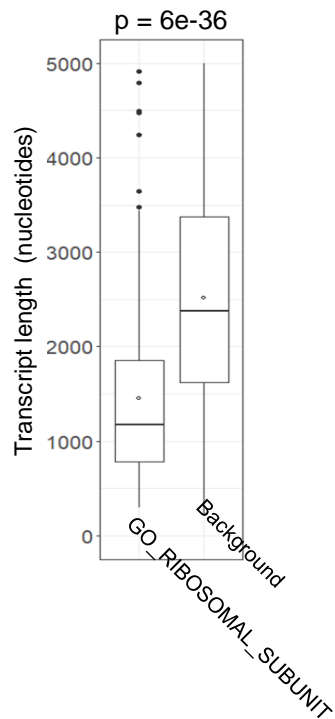

cqn normalization

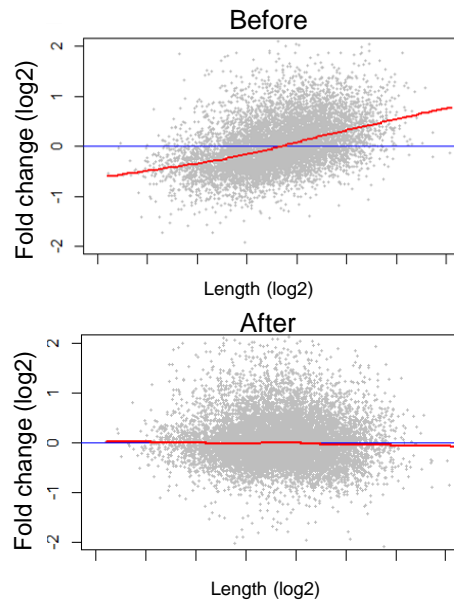

Corrected data

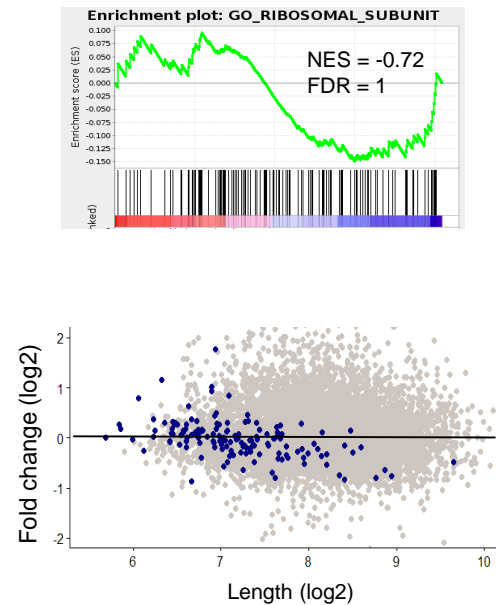

C Dataset #1: TNF (GSE64233): Replicate comparison

Original data

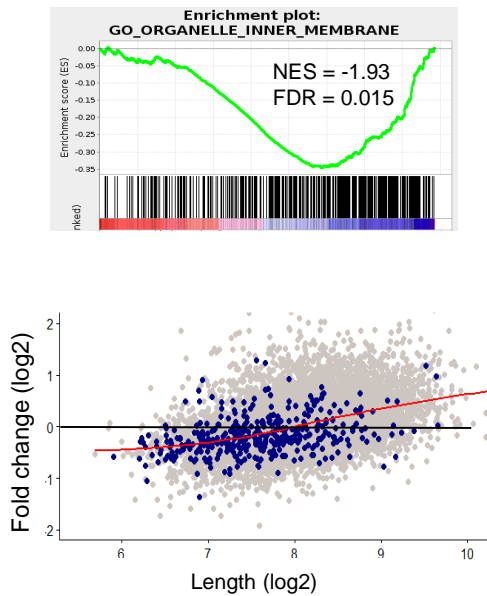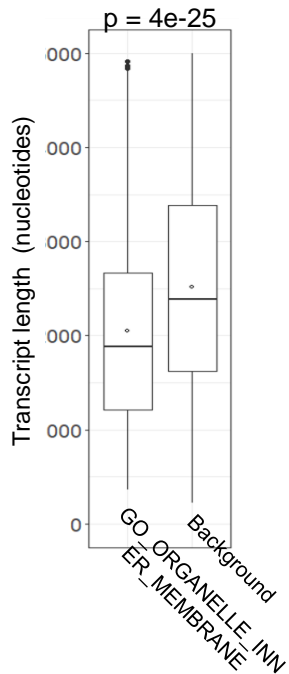

cqn normalization

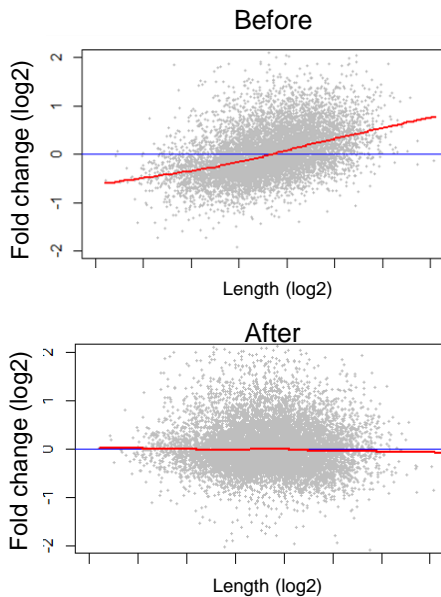

Corrected data

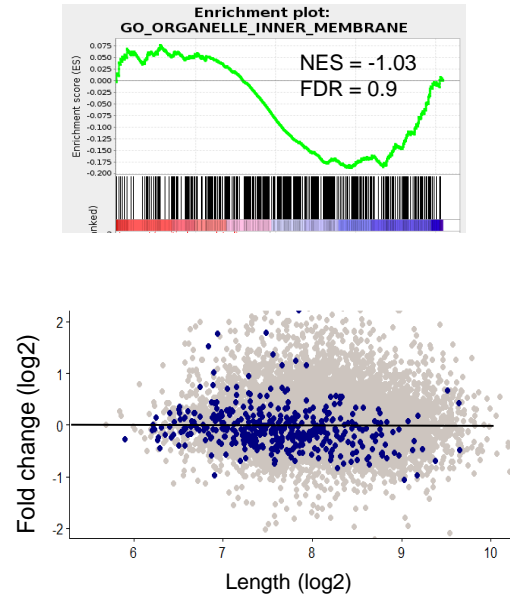

d Dataset #10: shSRC-1 in BC cells (GSE99647): Replicate comparison

Original data

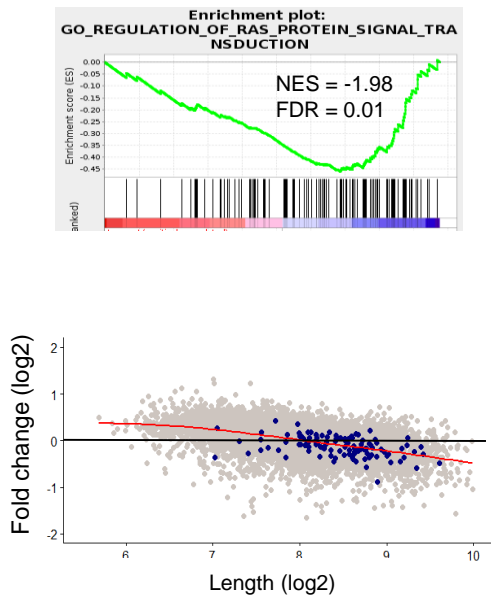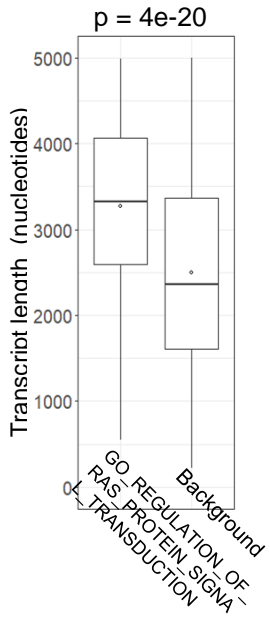

cqn normalization

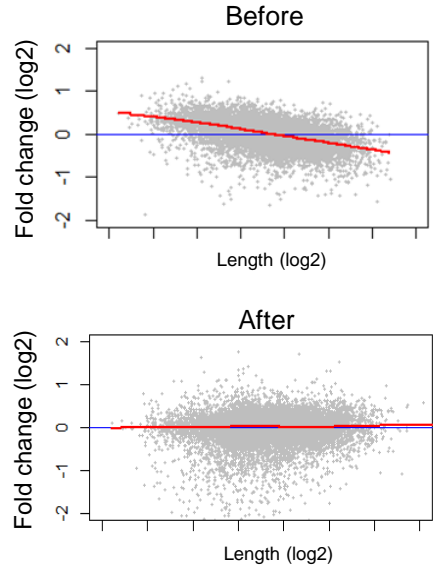

Corrected data

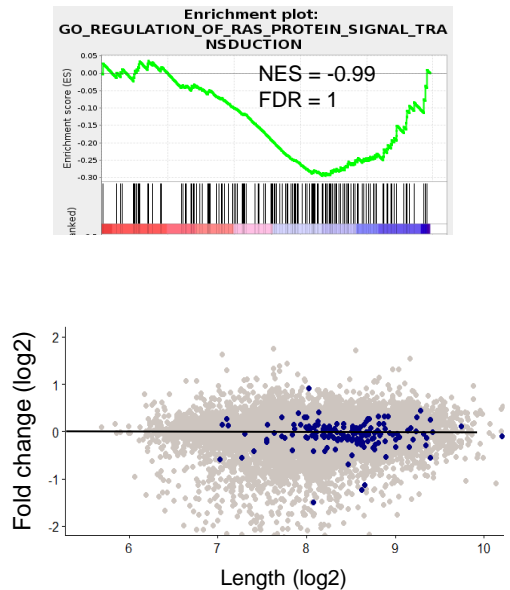

e Dataset #10: shSRC-1 in BC cells (GSE99647): Replicate comparison

Original data

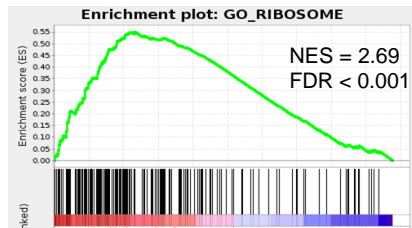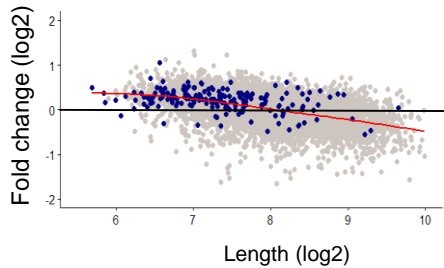

cqn normalization

Before

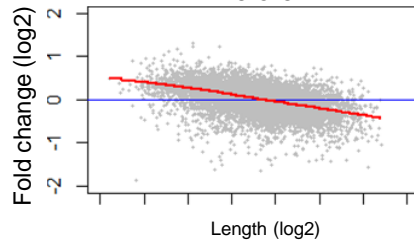

After

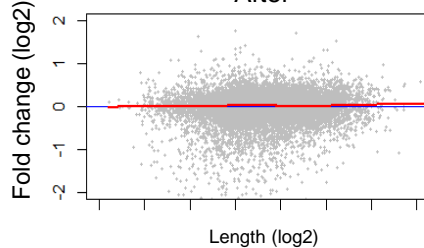

Corrected data

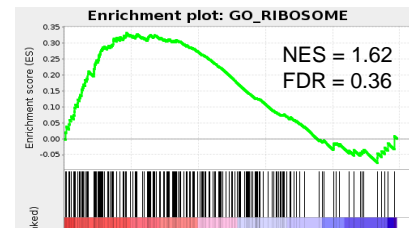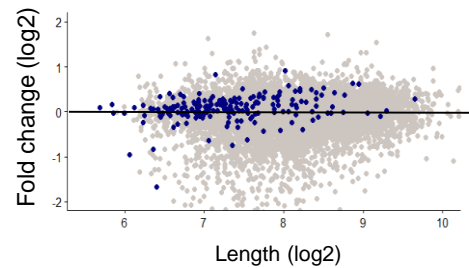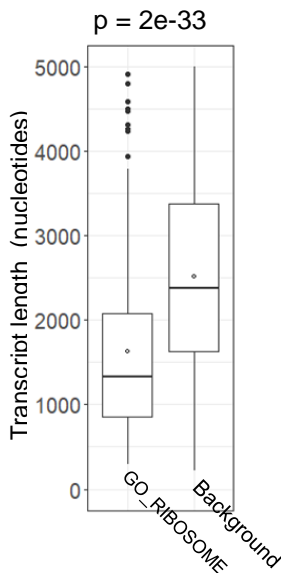

f Dataset #10: shSRC-1 in BC cells (GSE99647): Replicate comparison

Original data

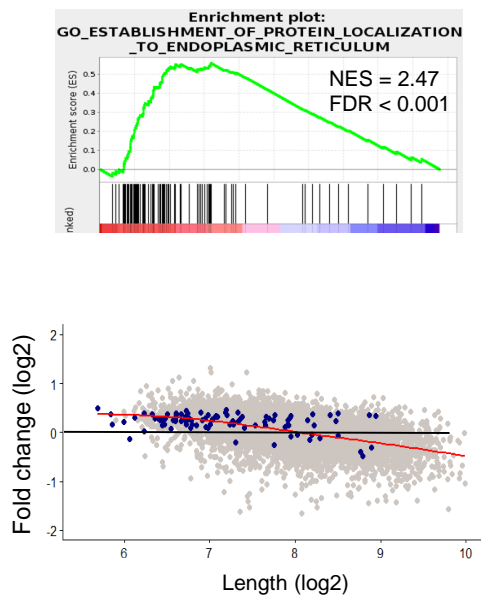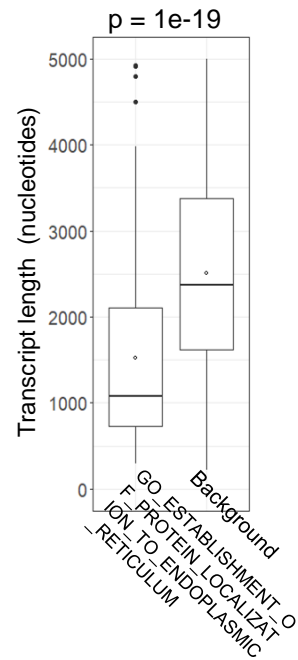

cqn normalization

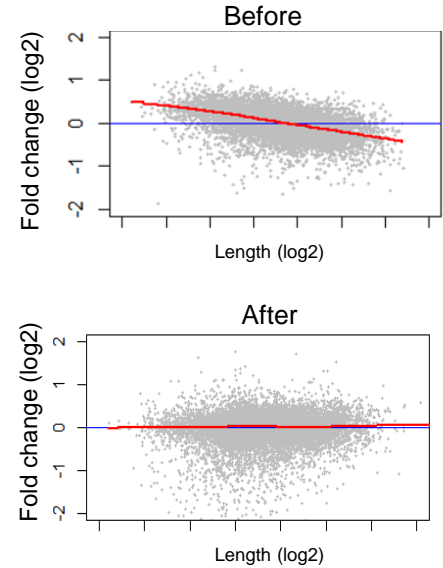

Corrected data

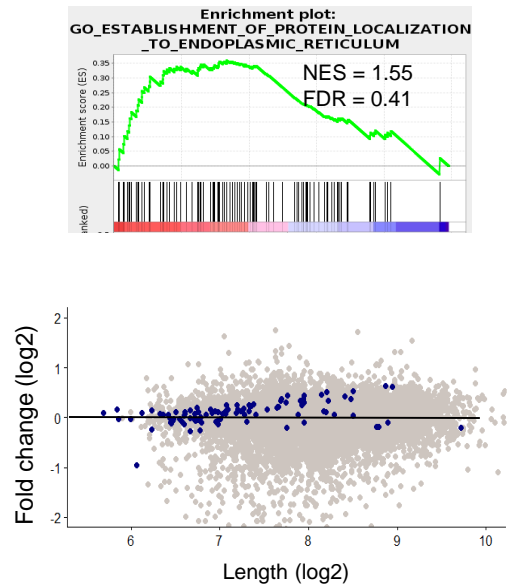

9 Dataset #10: shSRC-1 in BC cells (GSE99647): Replicate comparison

Original data

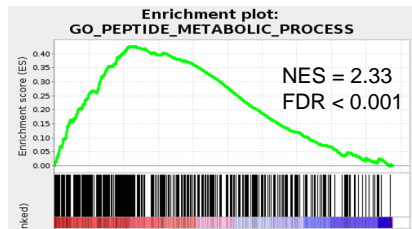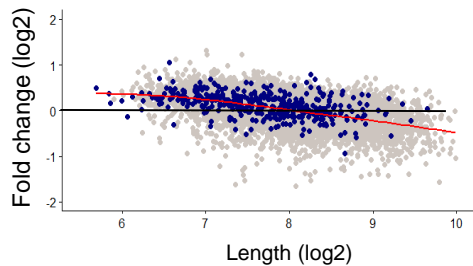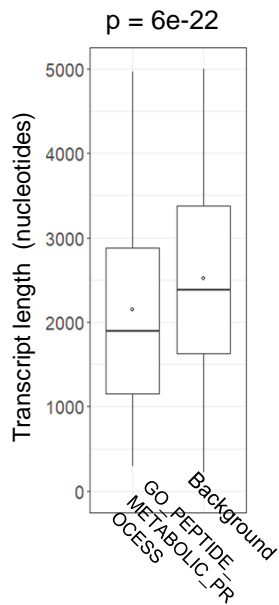

cqn normalization

Before

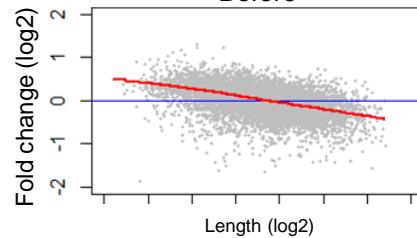

After

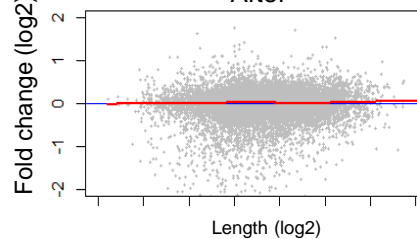

Corrected data

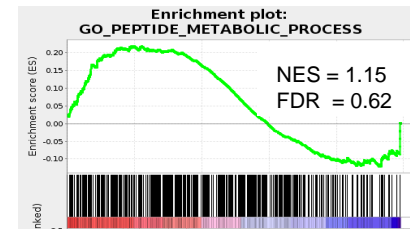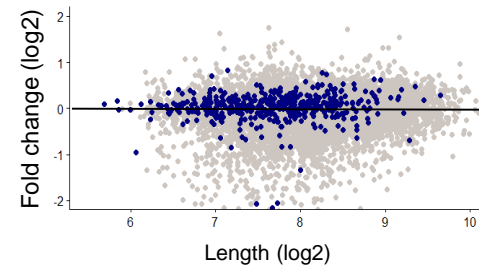

h Dataset #8: NCS treated vs. untreated MCF-7 cells (GSE101738): Replicate comparison

Original data

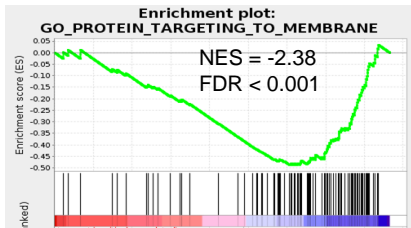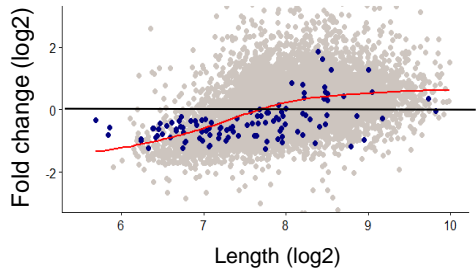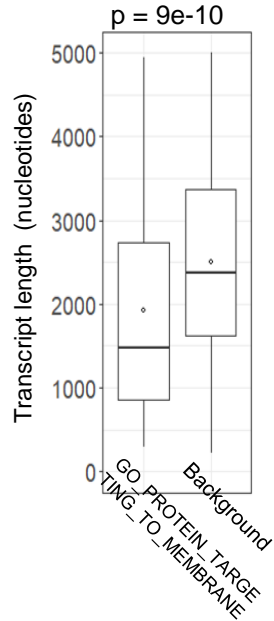

cqn normalization

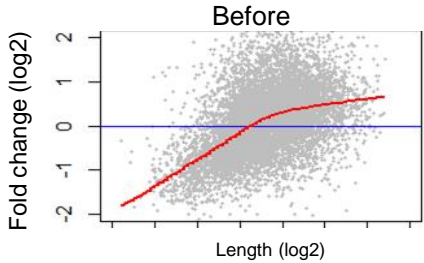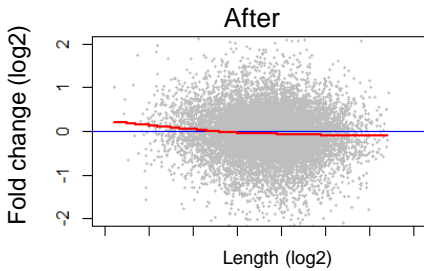

Corrected data

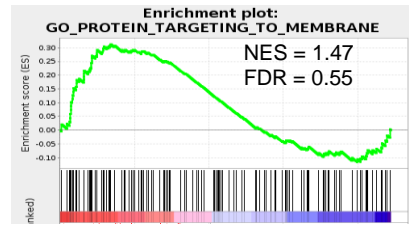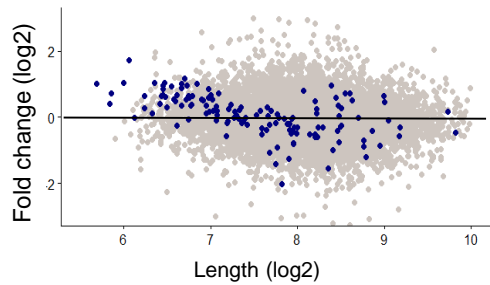



i Dataset #8: NCS treated vs. untreated MCF-7 cells (GSE101738): Replicate comparison

Original data

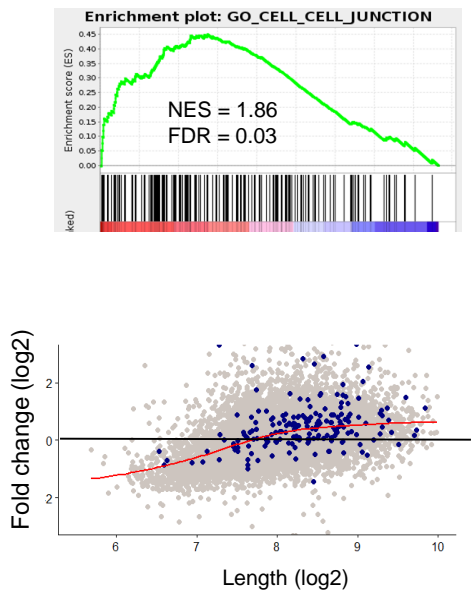

cqn normalization

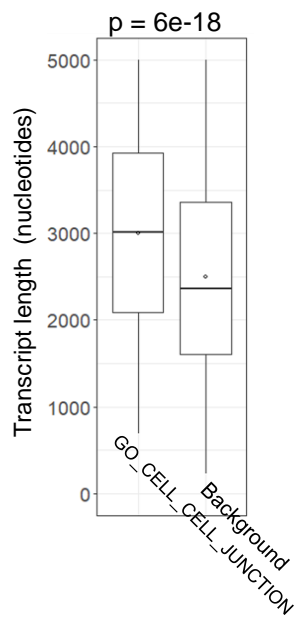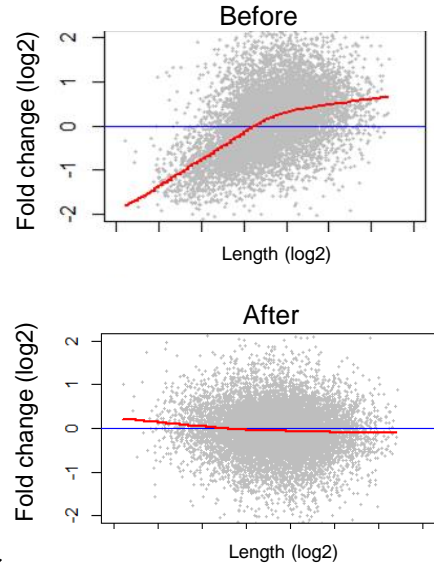

Corrected data

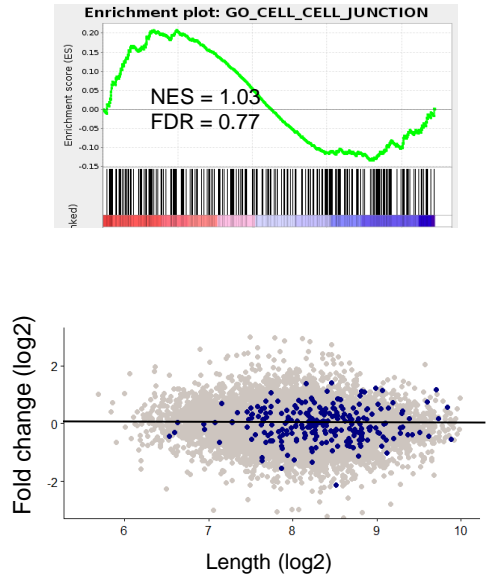

j Dataset #8: NCS treated vs. untreated MCF-7 cells (GSE101738): Replicate comparison

Original data

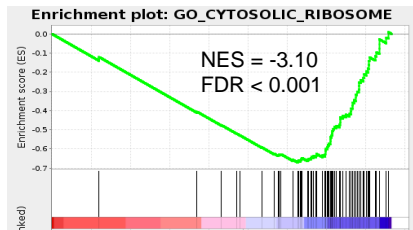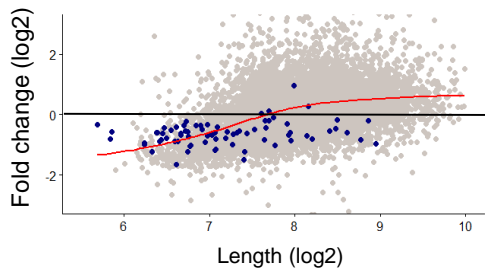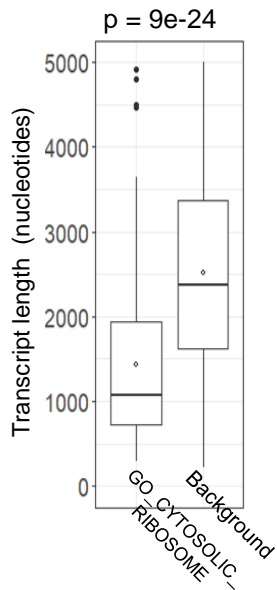

cqn normalization

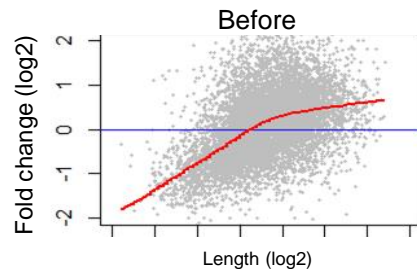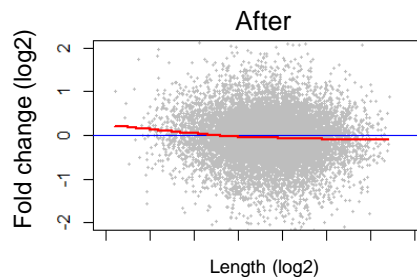

Corrected data

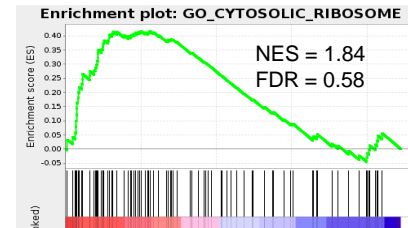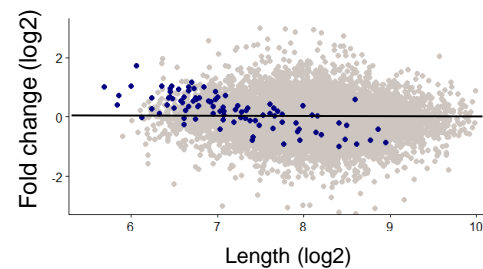

k Dataset #8: NCS treated vs. untreated MCF-7 cells (GSE101738): Replicate comparison

Original data

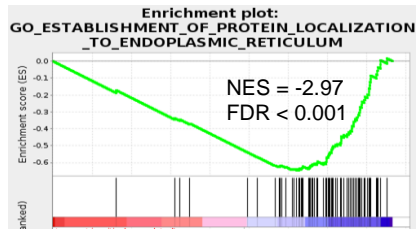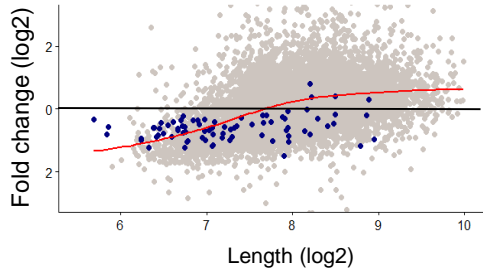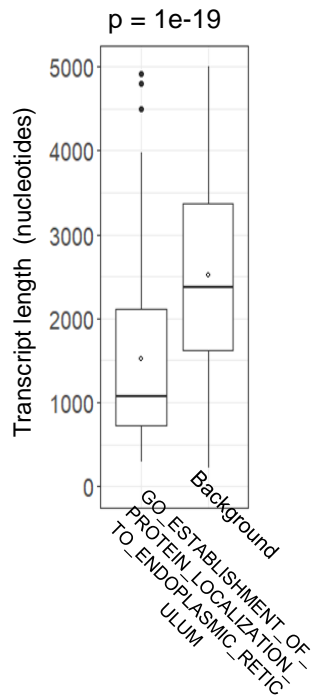

cqn normalization

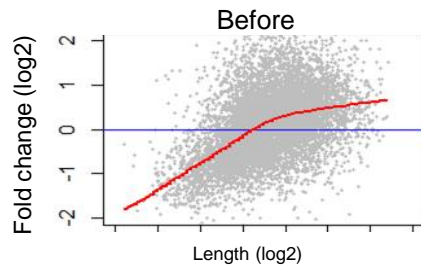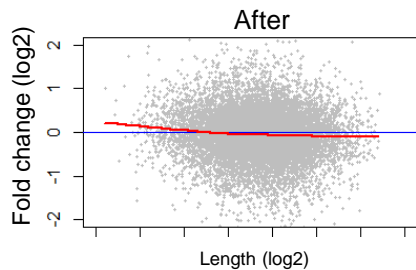

Corrected data

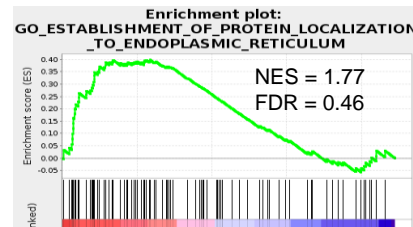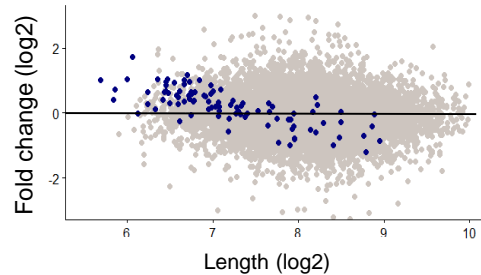

I Dataset #18: AI-10-49 treatment on ME-1 cells (GSE101788): Replicate comparison

Original data

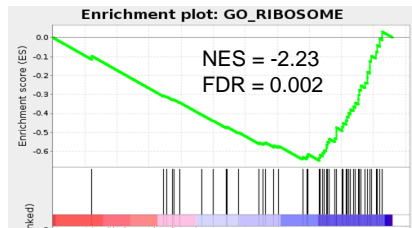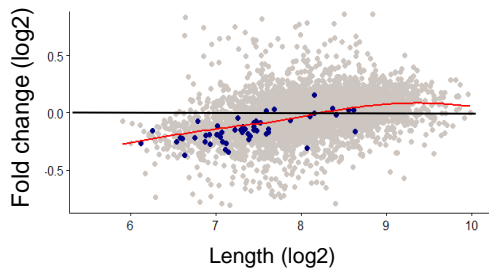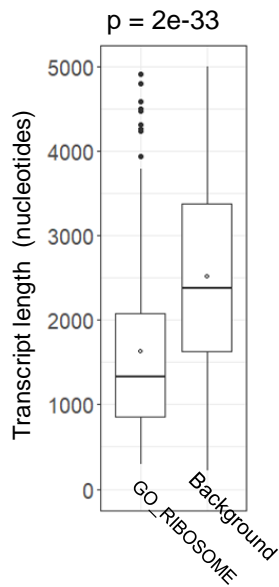

cqn normalization

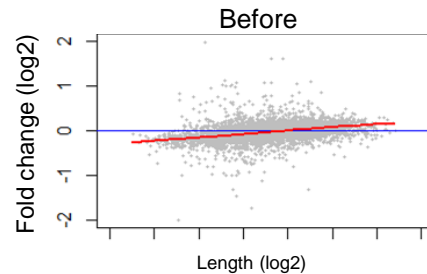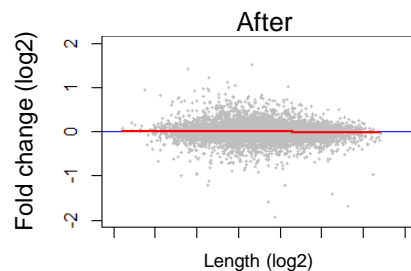

Corrected data

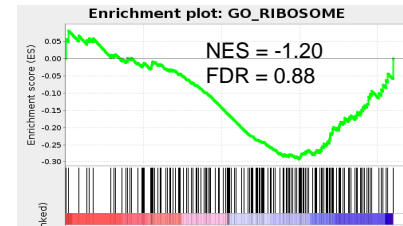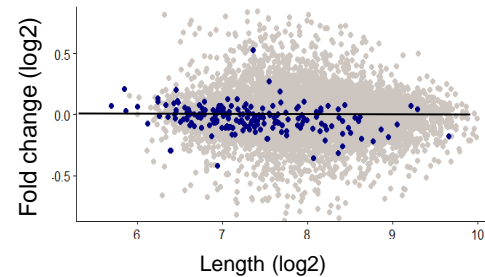

m Dataset #18: AI-10-49 treatment on ME-1 cells (GSE101788): Replicate comparison

Original data

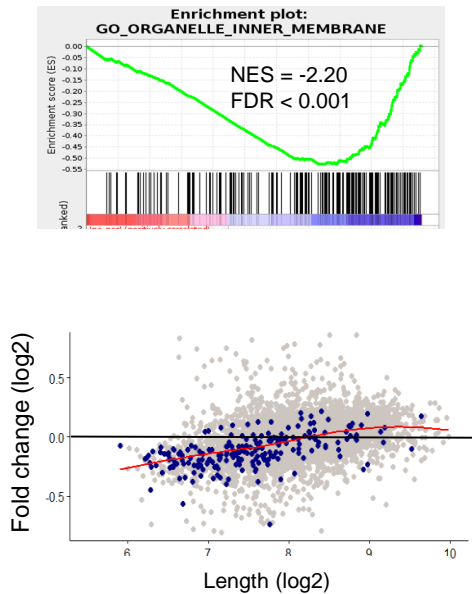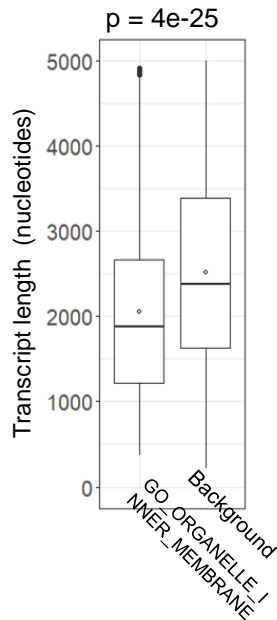

cqn normalization

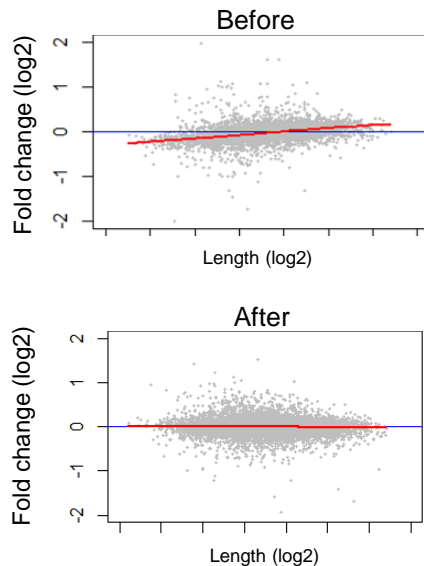

Corrected data

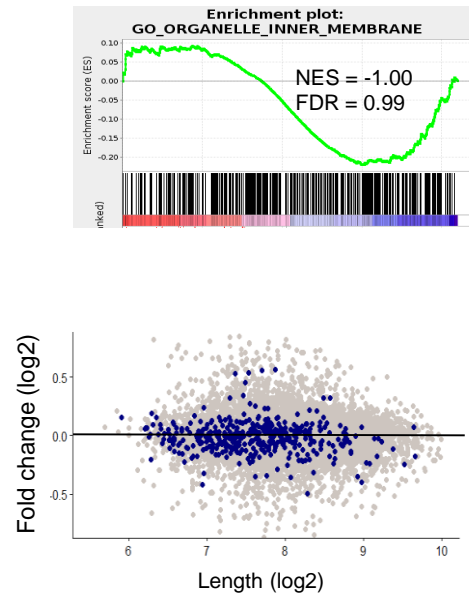

n Dataset #18: AI-10-49 treatment on ME-1 cells (GSE101788): Replicate comparison

Original data

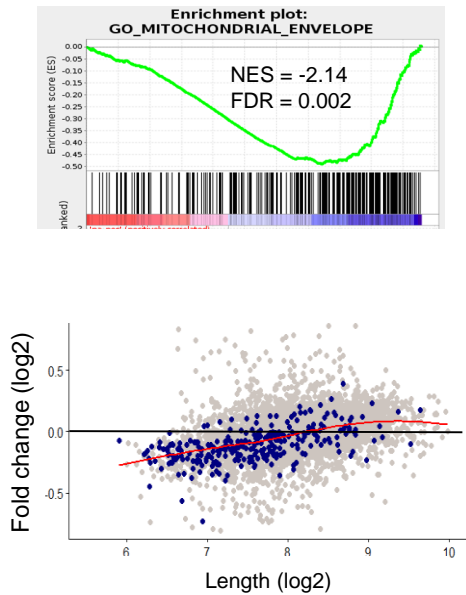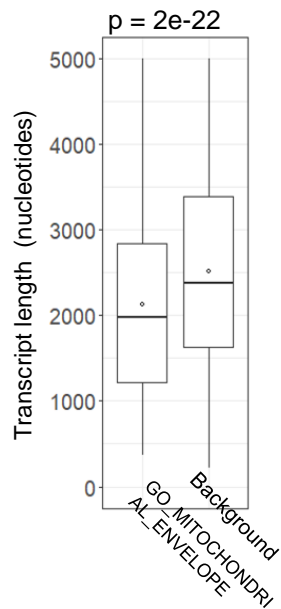

cqn normalization

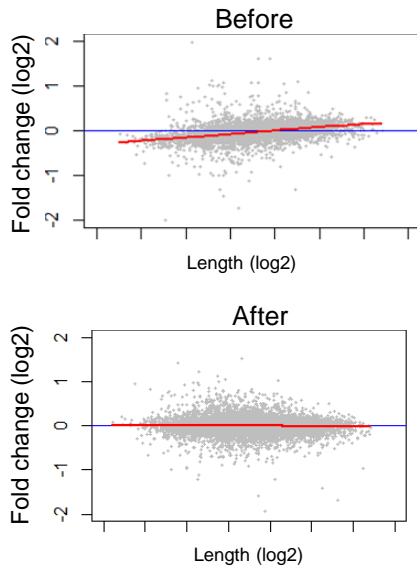

Corrected data

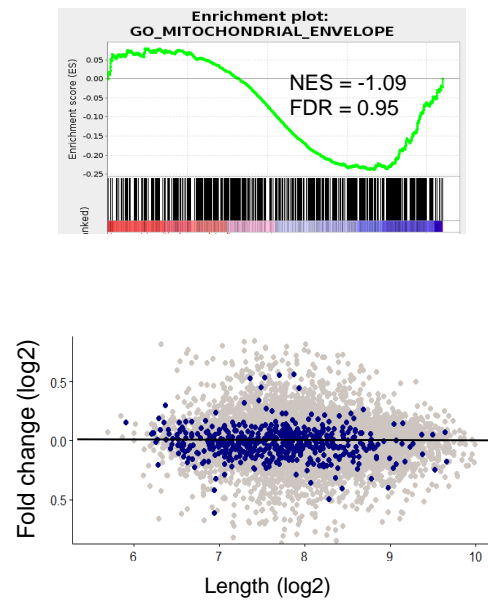

Supplement: pbio.3000481.s003.pdf [file pbio.3000481.s003.pdf]
