# Supplementary material for: Recurrent functional misinterpretation of RNA-seq data caused by sample-specific gene length bias
Source: PubMed Central journal article supplement (PMC6850523; doi:10.1371/journal.pbio.3000481), 2019-11-12

# TNFa dataset (GSE64233)

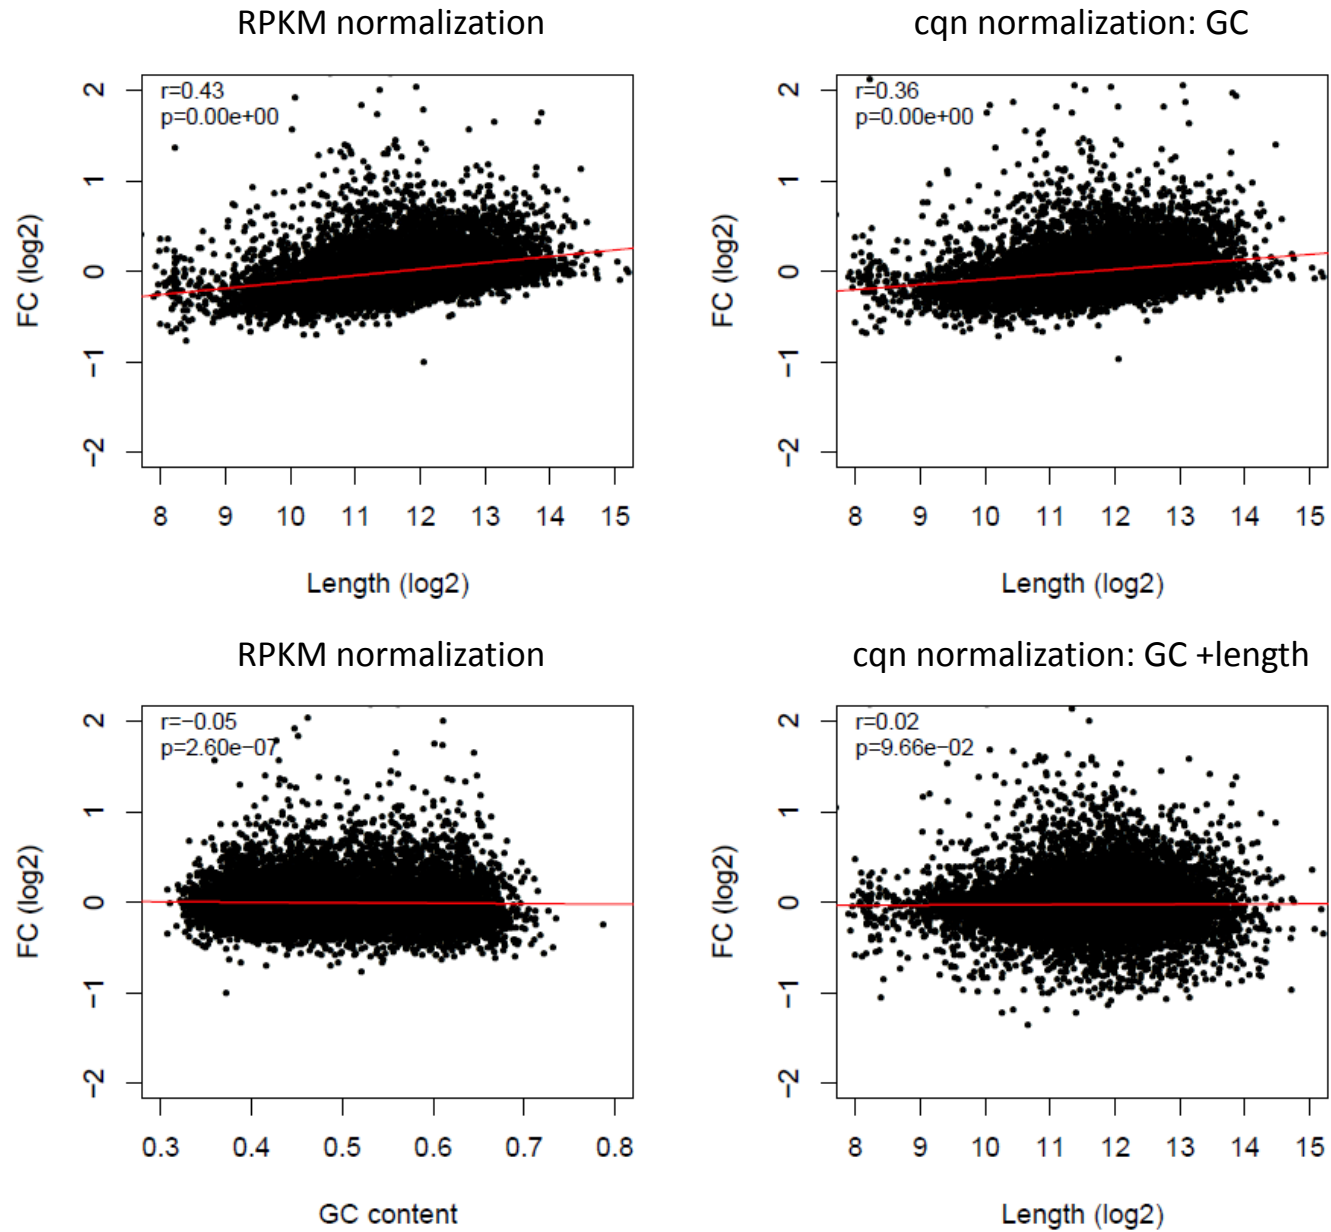

Supplementary Figure 4A

EDASeq: FQ between norm; No within norm

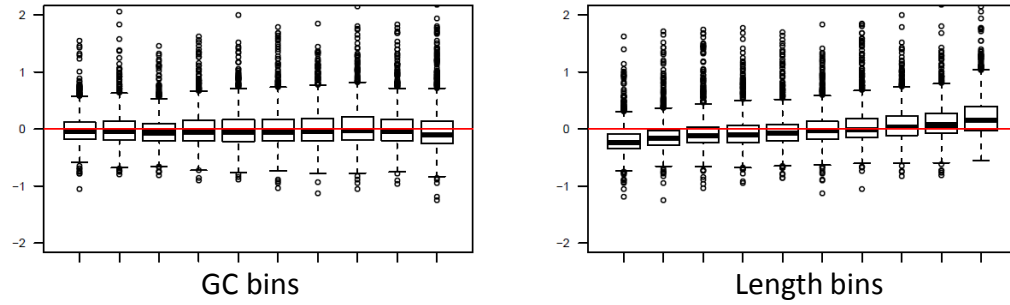

EDASeq: GC within norm + FQ between norm

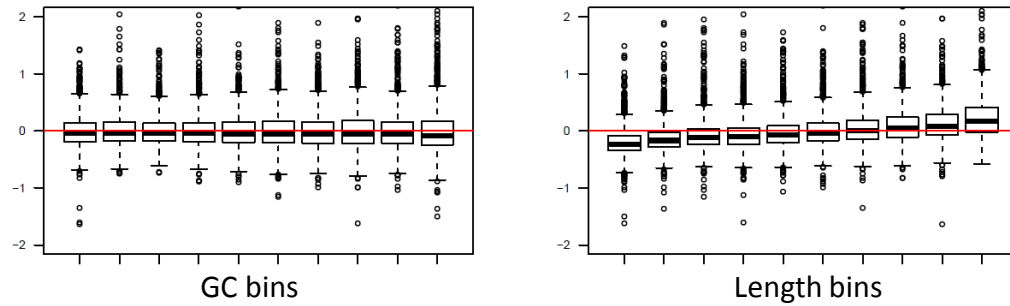

EDASeq: Length within norm + FQ between norm

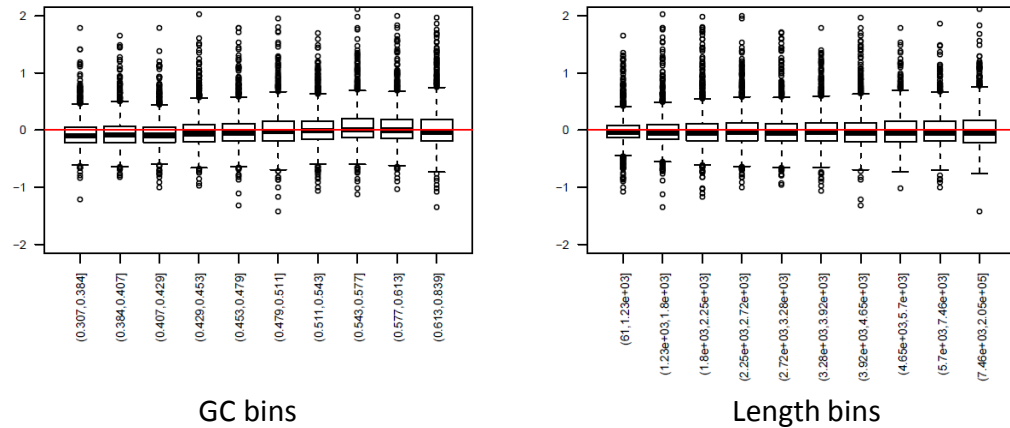

Supplement: pbio.3000481.s004.pdf [file pbio.3000481.s004.pdf]
