# Supplementary material for: Recurrent functional misinterpretation of RNA-seq data caused by sample-specific gene length bias
Source: PubMed Central journal article supplement (PMC6850523; doi:10.1371/journal.pbio.3000481), 2019-11-12
Supplement: pbio.3000481.s005.pdf [file pbio.3000481.s005.pdf]

# a Dataset #20 (GSE76771): Tunicamycin (ER Stress) vs. control

Original data

After cqn normalization

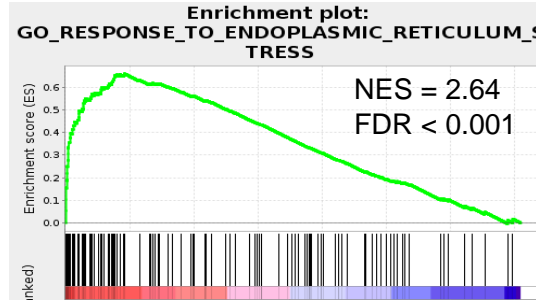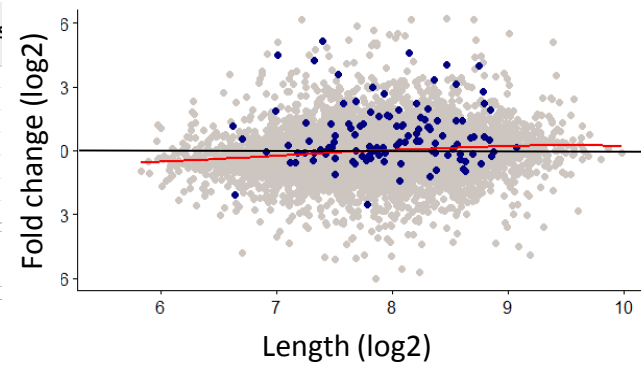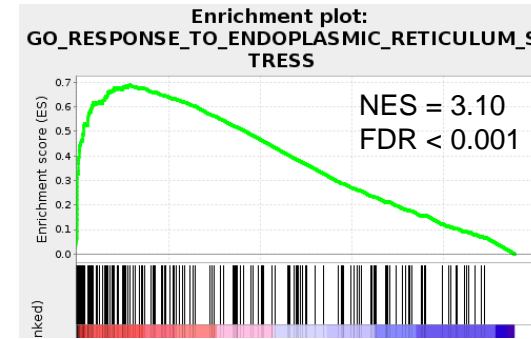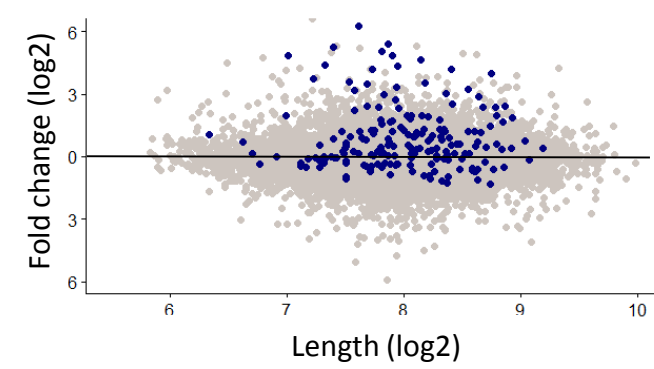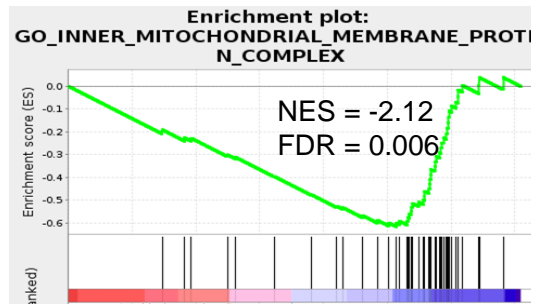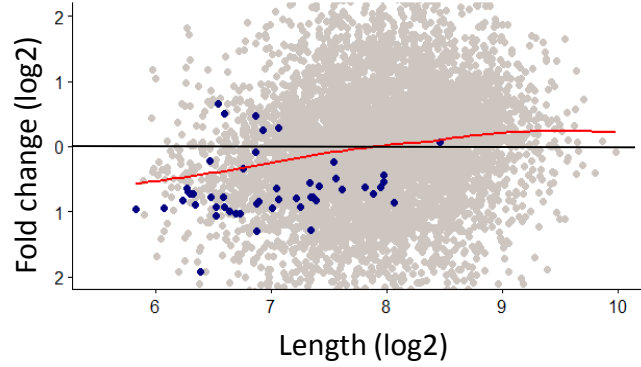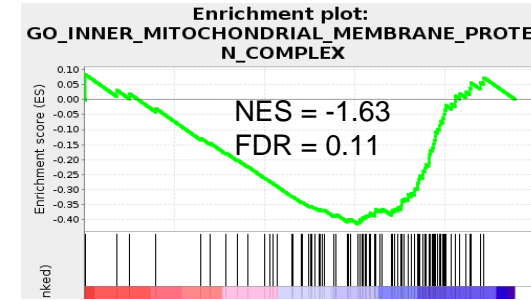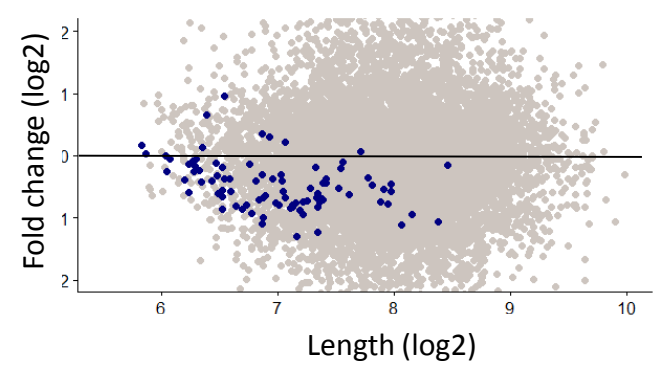

Figure S5

# b Dataset #8 (GSE101738): NCS (DNA damage) vs. control

Original data

After cqn normalization

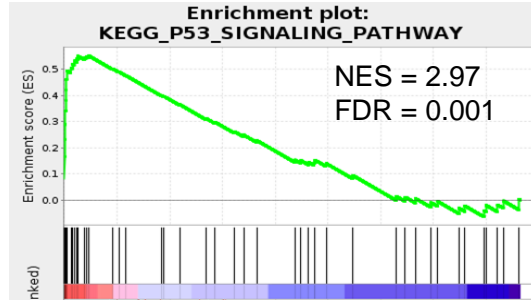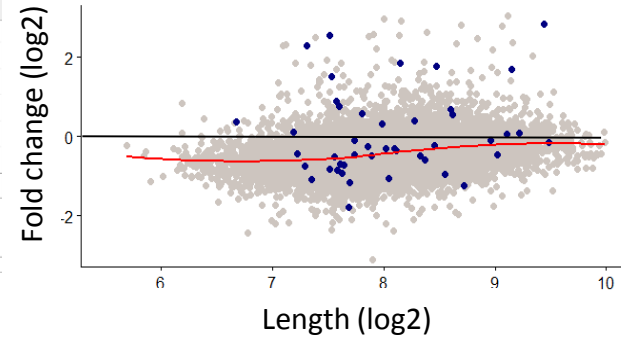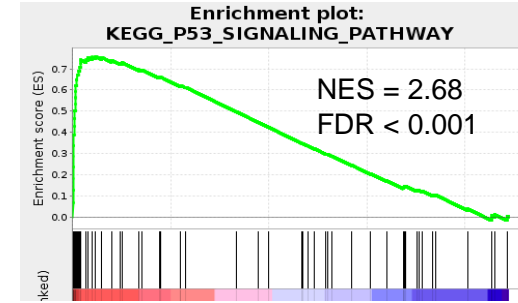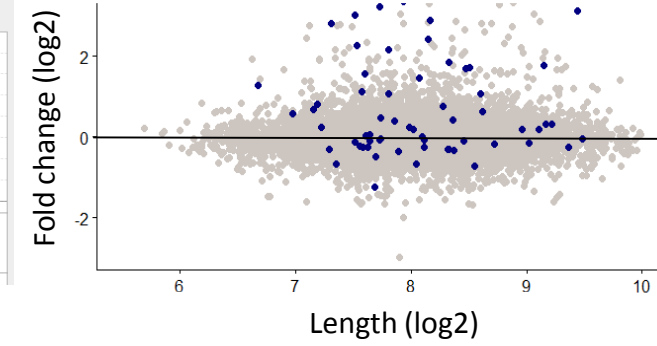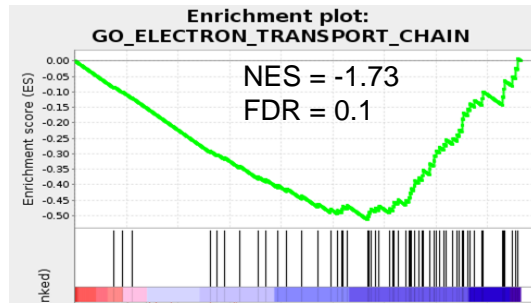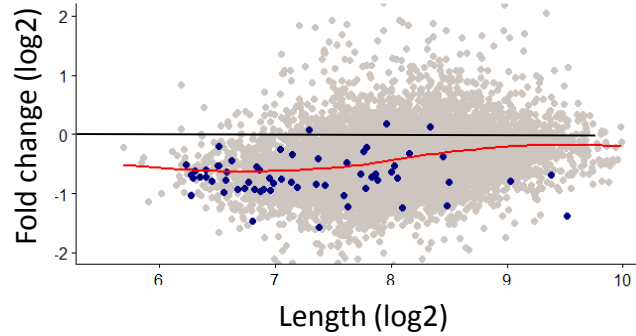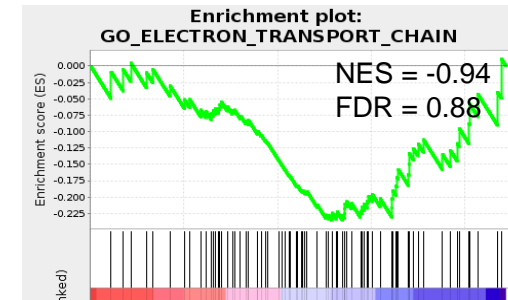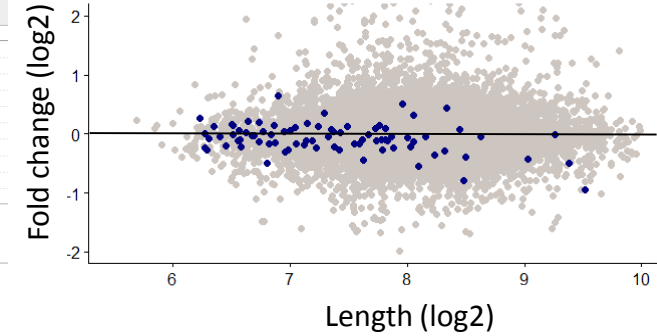

Figure S5

# c Dataset #22 (GSE106847): AA147 treatment (ER Stress) vs. control

Original data

After cqn normalization

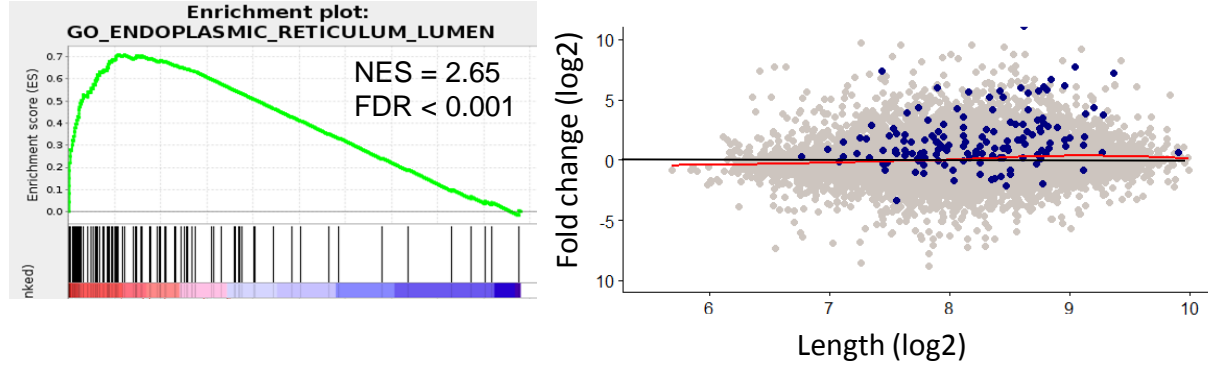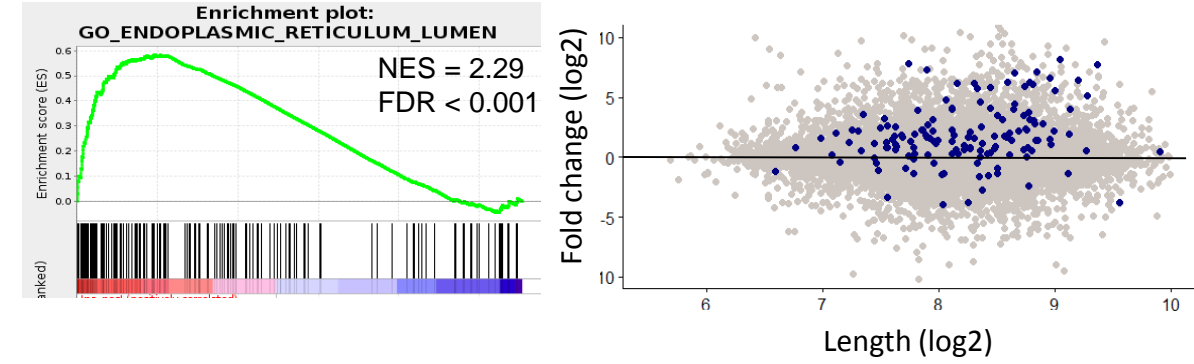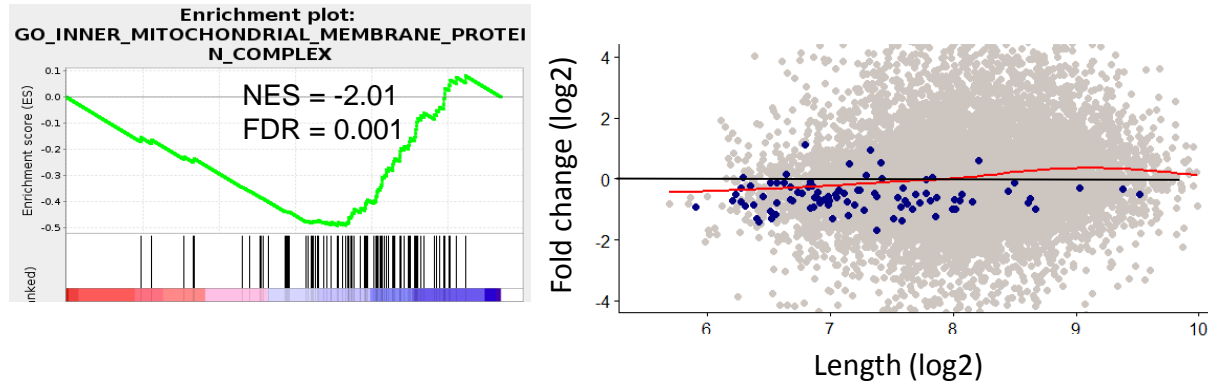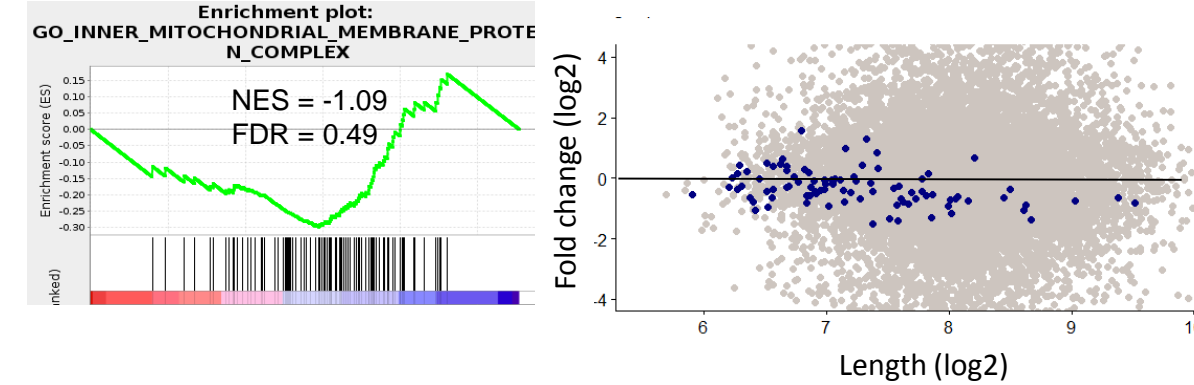

Figure S5

# d Dataset #21 (GSE84989): Thapsigargin (ER Stress) vs. control

Original data

After cqn normalization

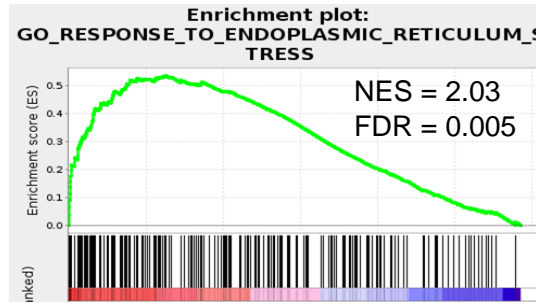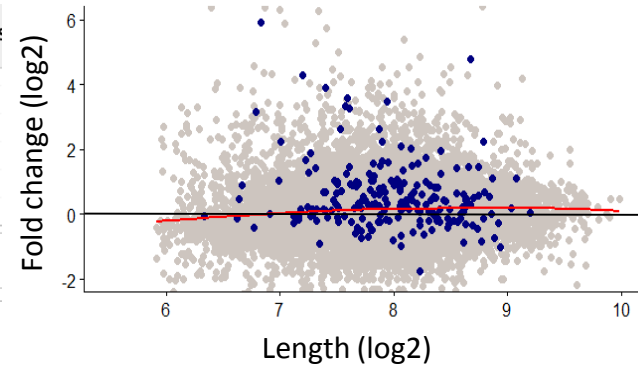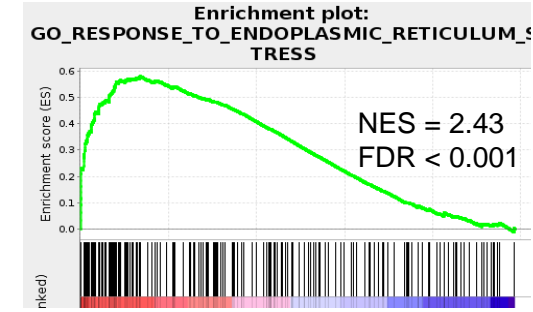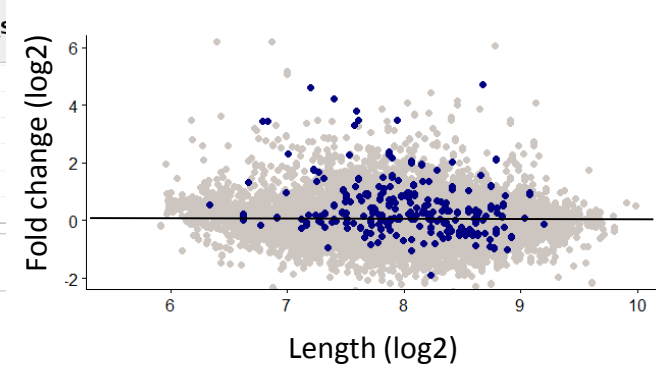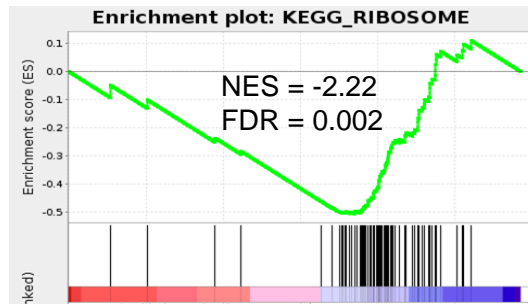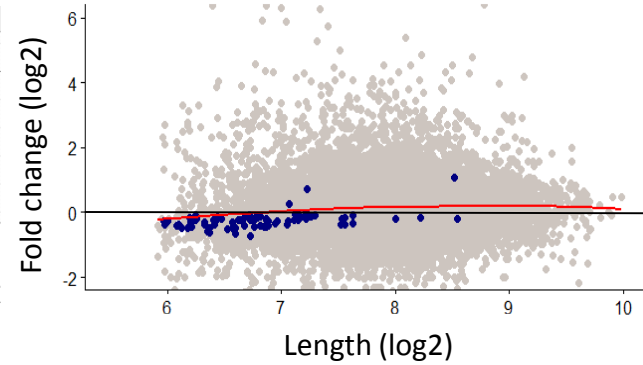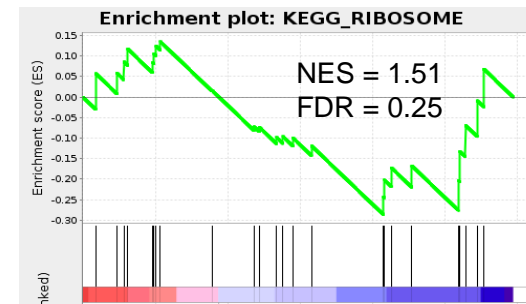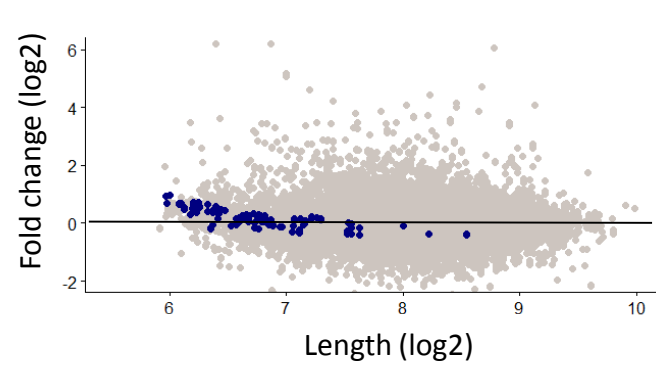

Figure S5

# e Dataset #19 (GSE42509): RAS<sup>G12V</sup> activation (senescence) vs. control

Original data

After cqn normalization

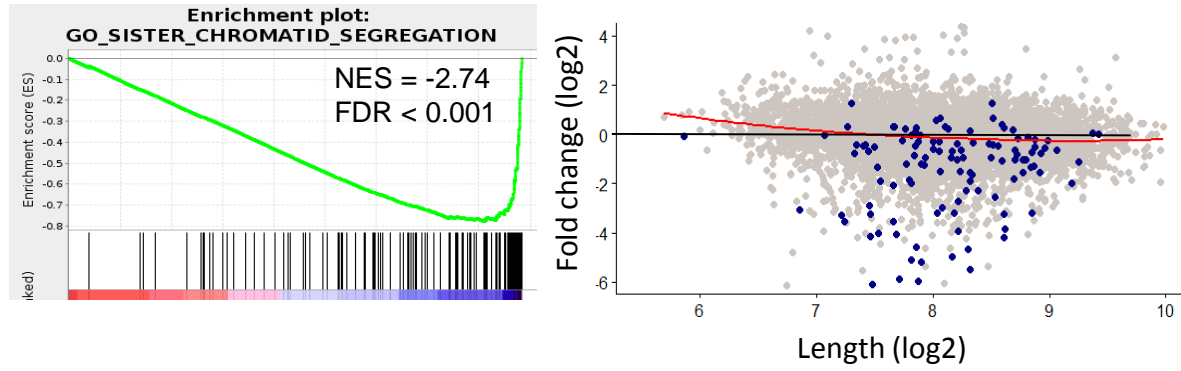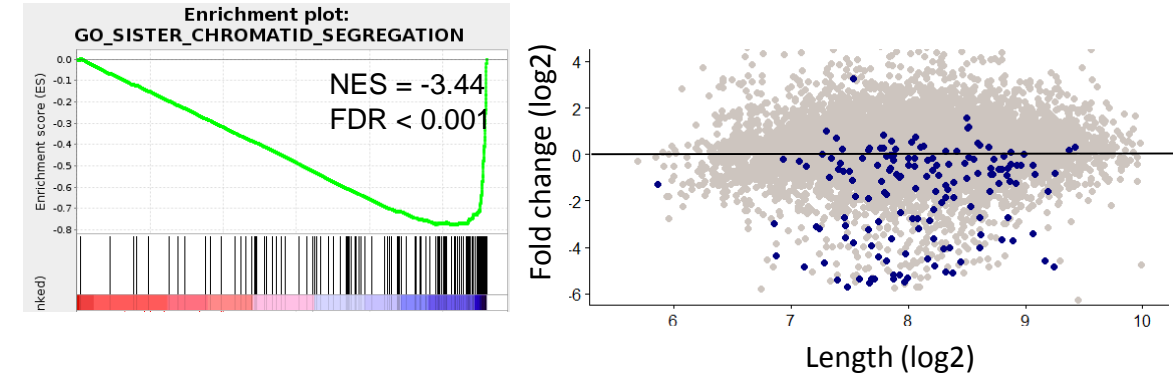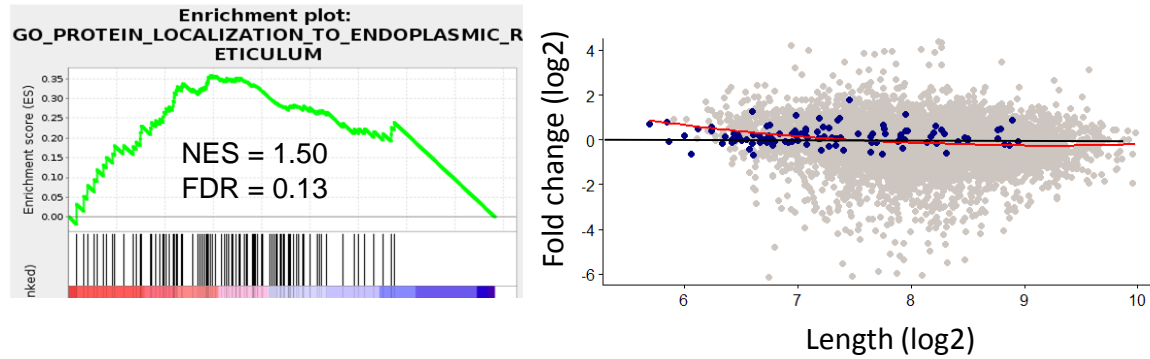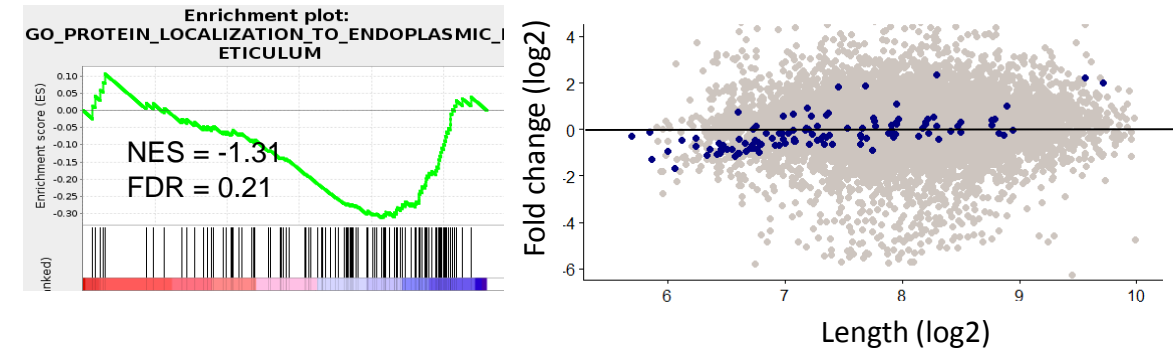

Figure S5

# f Dataset #18 (GSE101788): AI-10-49 treatment (apoptosis) vs. control

Original data

After cqn normalization

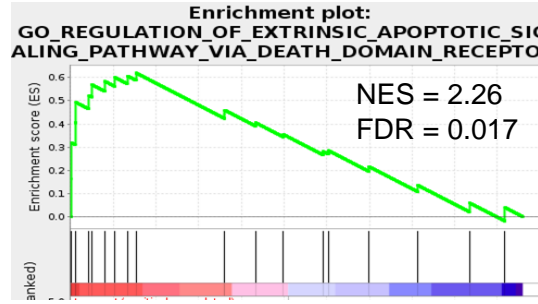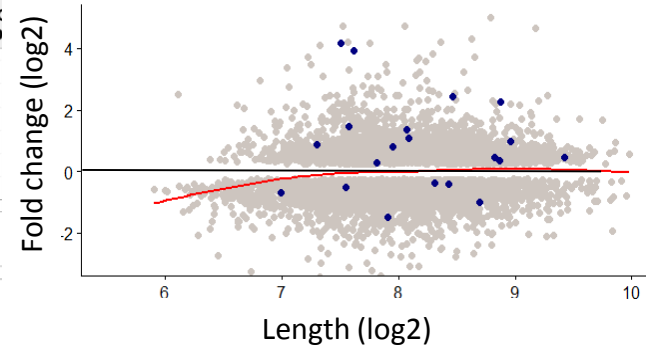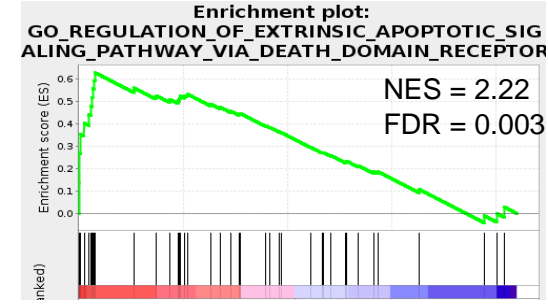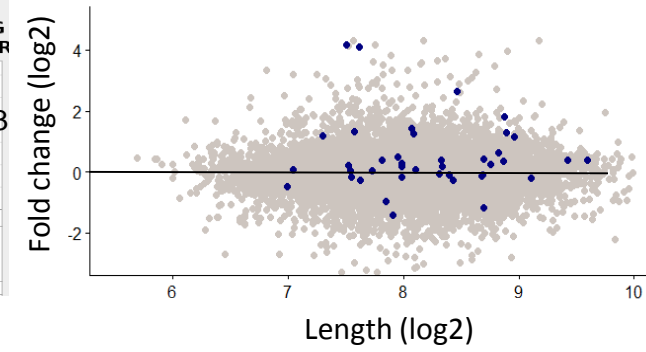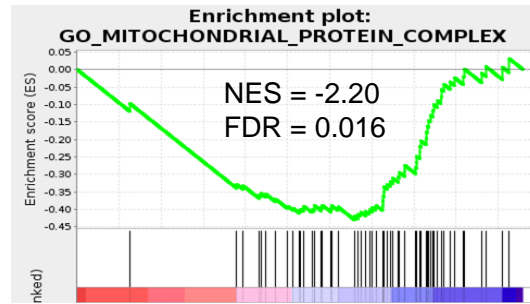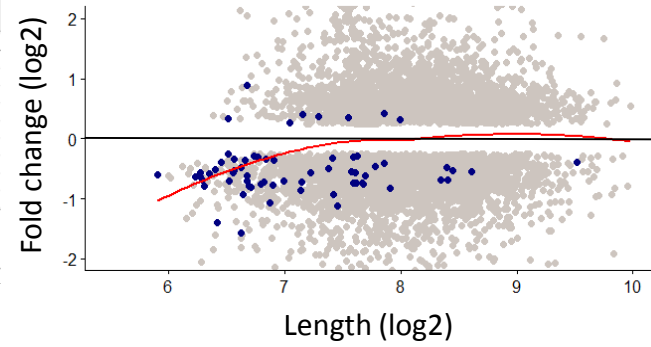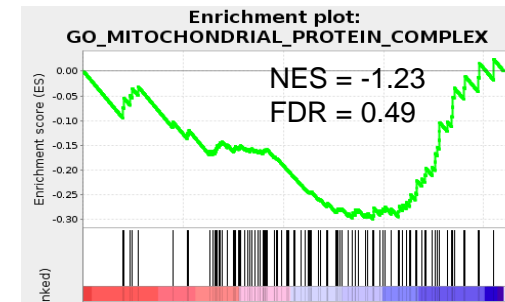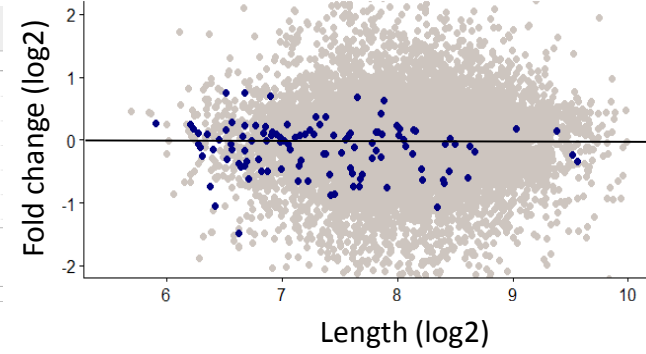

Figure S5
